# Supplementary material
Source: PubMed Central journal article supplement (PMC329124)
Supplement: gb-2003-4-11-r74-s2.pdf [file gb-2003-4-11-r74-s2.pdf]

**Supplemental Table 2: All the list of the human genes that generated PPs**

| PP num. | Ensembl ID      | RefSeq ID | Gene Name                                                                          | mRNA (bases) | GC content | Chromosome |
|---------|-----------------|-----------|------------------------------------------------------------------------------------|--------------|------------|------------|
| 52      | ENST00000228652 | NM_000224 | keratin 18 (KRT18)                                                                 | 1311         | 0.59       | 12         |
| 43      | ENST00000229239 | NM_002046 | glyceraldehyde-3-phosphate dehydrogenase (GAPD)                                    | 975          | 0.55       | 12         |
| 38      | ENST00000241454 | NM_000982 | ribosomal protein L21 (RPL21)                                                      | 623          | 0.41       | 13         |
| 36      | ENST00000264258 | NM_000993 | ribosomal protein L31 (RPL31)                                                      | 412          | 0.46       | 2          |
| 32      | ENST00000226734 | NM_000995 | ribosomal protein L34 (RPL34), transcript variant 1                                | 382          | 0.44       | 4          |
| 31      | ENST00000256818 | NM_001019 | ribosomal protein S15a (RPS15A)                                                    | 440          | 0.45       | 16         |
| 23      | ENST00000202773 | NM_000970 | ribosomal protein L6 (RPL6)                                                        | 861          | 0.47       | 12         |
| 23      | ENST00000241929 | NM_000969 | ribosomal protein L5 (RPL5)                                                        | 951          | 0.43       | 1          |
| 21      | ENST00000255320 | NM_002128 | high-mobility group box 1 (HMGB1)                                                  | 971          | 0.41       | 13         |
| 20      | ENST00000245458 | NM_001032 | ribosomal protein S29 (RPS29)                                                      | 195          | 0.53       | 14         |
| 18      | ENST00000260896 | NM_001026 | ribosomal protein S24 (RPS24), transcript variant 2                                | 390          | 0.44       | 10         |
| 17      | ENST00000009589 | NM_001023 | ribosomal protein S20 (RPS20)                                                      | 504          | 0.47       | 8          |
| 16      | ENST00000225430 | NM_000981 | ribosomal protein L19 (RPL19)                                                      | 667          | 0.52       | 17         |
| 14      | ENST00000230050 | NM_001016 | ribosomal protein S12 (RPS12)                                                      | 493          | 0.49       | 6          |
| 12      | ENST00000253004 | NM_054012 | argininosuccinate synthetase (ASS), transcript variant 2                           | 1245         | 0.56       | 9          |
| 12      | ENST00000216296 | NM_004500 | heterogeneous nuclear ribonucleoprotein C (C1/C2)<br>(HNRPC), transcript variant 2 | 1588         | 0.43       | 14         |
| 12      | ENST00000211372 | NM_022551 | ribosomal protein S18 (RPS18)                                                      | 494          | 0.51       | 6          |
| 11      | ENST00000263097 | NM_004368 | calponin 2 (CNN2)                                                                  | 882          | 0.61       | 19         |
| 11      | ENST00000253788 | NM_000988 | ribosomal protein L27 (RPL27)                                                      | 450          | 0.46       | 17         |
| 11      | ENST00000259689 | NM_001010 | ribosomal protein S6 (RPS6)                                                        | 784          | 0.46       | 9          |
| 11      | ENST00000260379 | NM_001003 | ribosomal protein, large, P1 (RPLP1)                                               | 510          | 0.56       | 15         |
| 11      | ENST00000011649 | NM_007104 | ribosomal protein L10a (RPL10A)                                                    | 682          | 0.51       | 6          |
| 10      | ENST00000255477 | NM_003295 | tumor protein, translationally-controlled 1 (TPT1)                                 | 829          | 0.45       | 13         |
| 10      | ENST00000227378 | NM_006597 | heat shock 70kDa protein 8 (HSPA8), transcript variant 1                           | 1938         | 0.46       | 11         |
| 10      | ENST00000218437 | NM_001007 | ribosomal protein S4, X-linked (RPS4X)                                             | 853          | 0.48       | X          |
| 9       | ENST00000220072 | NM_001021 | ribosomal protein S17 (RPS17)                                                      | 453          | 0.49       | 15         |
| 9       | ENST00000265385 | NM_000883 | IMP (inosine monophosphate) dehydrogenase 1<br>(IMPDH1)                            | 1425         | 0.59       | 7          |
| 9       | ENST00000265264 | NM_000986 | ribosomal protein L24 (RPL24)                                                      | 447          | 0.48       | 3          |
| 9       | ENST00000216146 | NM_000967 | ribosomal protein L3 (RPL3)                                                        | 1265         | 0.54       | 22         |
| 8       | ENST00000196551 | NM_001009 | ribosomal protein S5 (RPS5)                                                        | 720          | 0.58       | 19         |
| 8       | ENST00000228140 | NM_001017 | ribosomal protein S13 (RPS13)                                                      | 495          | 0.45       | 11         |
| 7       | ENST00000221267 | NM_003333 | ubiquitin A-52 residue ribosomal protein fusion product 1                          | 384          | 0.53       | 19         |

|   |                 |           |                                                                                                                                                          |      |      |    |
|---|-----------------|-----------|----------------------------------------------------------------------------------------------------------------------------------------------------------|------|------|----|
|   |                 |           | (UBA52)                                                                                                                                                  |      |      |    |
| 7 | ENST00000233609 | NM_001018 | ribosomal protein S15 (RPS15)                                                                                                                            | 469  | 0.62 | 19 |
| 7 | ENST00000257522 | NM_030940 | hypothetical protein MGC4276 similar to CG8198<br>(MGC4276)                                                                                              | 255  | 0.38 | 9  |
| 7 | ENST00000265333 | NM_003374 | voltage-dependent anion channel 1 (VDAC1)                                                                                                                | 1498 | 0.45 | 5  |
| 7 | ENST00000236900 | NM_001028 | ribosomal protein S25 (RPS25)                                                                                                                            | 426  | 0.45 | 11 |
| 7 | ENST00000264254 | NM_024065 | hypothetical protein MGC3062 (MGC3062)                                                                                                                   | 955  | 0.42 | 2  |
| 7 | ENST00000246201 | NM_003908 | eukaryotic translation initiation factor 2, subunit 2 beta,<br>38kDa (EIF2S2)                                                                            | 1300 | 0.39 | 20 |
| 6 | ENST00000245206 | NM_002080 | glutamic-oxaloacetic transaminase 2, mitochondrial<br>(aspartate aminotransferase 2) (GOT2), nuclear gene<br>encoding mitochondrial protein              | 2331 | 0.49 | 16 |
| 6 | ENST00000238591 | NM_015962 | CGI-35 protein (CGI-35)                                                                                                                                  | 1019 | 0.37 | 14 |
| 6 | ENST00000249380 | NM_005000 | NADH dehydrogenase (ubiquinone) 1 alpha subcomplex,<br>5, 13kDa (NDUFA5), nuclear gene encoding<br>mitochondrial protein                                 | 339  | 0.41 | 7  |
| 6 | ENST00000228825 | NM_005719 | actin related protein 2/3 complex, subunit 3, 21kDa<br>(ARPC3)                                                                                           | 786  | 0.41 | 12 |
| 6 | ENST00000261565 | NM_003187 | TAF9 RNA polymerase II, TATA box binding protein<br>(TBP)-associated factor, 32kDa (TAF9), transcript variant<br>1                                       | 833  | 0.34 | 5  |
| 6 | ENST00000227157 | NM_005566 | lactate dehydrogenase A (LDHA)                                                                                                                           | 1589 | 0.43 | 11 |
| 6 | ENST00000264221 | NM_006452 | phosphoribosylaminoimidazole carboxylase,<br>phosphoribosylaminoimidazole succinocarboxamide<br>synthetase (PAICS)                                       | 1385 | 0.41 | 4  |
| 6 | ENST00000037869 | NM_032822 | hypothetical protein FLJ14668 (FLJ14668)                                                                                                                 | 414  | 0.56 | 2  |
| 6 | ENST00000235094 | NM_001688 | ATP synthase, H+ transporting, mitochondrial F0<br>complex, subunit b, isoform 1 (ATP5F1)                                                                | 1104 | 0.43 | 1  |
| 6 | ENST00000234875 | NM_000983 | ribosomal protein L22 (RPL22)                                                                                                                            | 541  | 0.41 | 1  |
| 6 | ENST00000005593 | NM_001152 | solute carrier family 25 (mitochondrial carrier; adenine<br>nucleotide translocator), member 5 (SLC25A5), nuclear<br>gene encoding mitochondrial protein | 894  | 0.52 | X  |
| 5 | ENST00000221975 | NM_001022 | ribosomal protein S19 (RPS19)                                                                                                                            | 429  | 0.59 | 19 |
| 5 | ENST00000245857 | NM_000978 | ribosomal protein L23 (RPL23)                                                                                                                            | 452  | 0.46 | 17 |
| 5 | ENST00000219204 | NM_012106 | binder of Arl Two (BART1)                                                                                                                                | 489  | 0.43 | 16 |
| 5 | ENST00000265749 | NM_001788 | CDC10 cell division cycle 10 homolog ( <i>S. cerevisiae</i> )                                                                                            | 2260 | 0.36 | 7  |

|   |                 |           |                                                                                                                           |      |      |    |
|---|-----------------|-----------|---------------------------------------------------------------------------------------------------------------------------|------|------|----|
|   |                 |           | (CDC10)                                                                                                                   |      |      |    |
| 5 | ENST00000265413 | NM_007355 | heat shock 90kDa protein 1, beta (HSPCB)                                                                                  | 2172 | 0.48 | 6  |
| 5 | ENST00000260956 | NM_003142 | Sjogren syndrome antigen B (autoantigen La) (SSB)                                                                         | 1535 | 0.35 | 2  |
| 5 | ENST00000234290 | NM_006333 | nuclear DNA-binding protein (C1D)                                                                                         | 423  | 0.38 | 2  |
| 5 | ENST00000240185 | NM_007375 | TAR DNA binding protein (TARDBP)                                                                                          | 1242 | 0.47 | 1  |
| 5 | ENST00000216252 | NM_032758 | PHD finger protein 5A (PHF5A)                                                                                             | 330  | 0.48 | 22 |
| 4 | ENST00000254810 | NM_005324 | H3 histone, family 3B (H3.3B) (H3F3B)                                                                                     | 408  | 0.6  | 17 |
| 4 | ENST00000254843 | NM_001970 | eukaryotic translation initiation factor 5A (EIF5A)                                                                       | 543  | 0.52 | 17 |
| 4 | ENST00000216281 | NM_005348 | heat shock 90kDa protein 1, alpha (HSPCA)                                                                                 | 2196 | 0.42 | 14 |
| 4 | ENST00000216802 | NM_002818 | proteasome (prosome, macropain) activator subunit 2<br>(PA28 beta) (PSME2)                                                | 827  | 0.51 | 14 |
| 4 | ENST00000223215 | NM_002402 | mesoderm specific transcript homolog (mouse) (MEST)                                                                       | 2220 | 0.43 | 7  |
| 4 | ENST00000262942 | NM_006409 | actin related protein 2/3 complex, subunit 1A, 41kDa<br>(ARPC1A)                                                          | 1074 | 0.51 | 7  |
| 4 | ENST00000222877 | NM_016139 | 16.7Kd protein (LOC51142)                                                                                                 | 508  | 0.62 | 7  |
| 4 | ENST00000252555 | NM_007111 | transcription factor Dp-1 (TFDP1)                                                                                         | 1218 | 0.54 | 13 |
| 4 | ENST00000262056 | NM_001417 | eukaryotic translation initiation factor 4B (EIF4B)                                                                       | 3811 | 0.45 | 12 |
| 4 | ENST00000261798 | NM_001892 | casein kinase 1, alpha 1 (CSNK1A1)                                                                                        | 1246 | 0.46 | 5  |
| 4 | ENST00000265073 | NM_006713 | activated RNA polymerase II transcription cofactor 4<br>(PC4)                                                             | 306  | 0.4  | 5  |
| 4 | ENST00000263577 | NM_016952 | cell adhesion molecule-related/down-regulated by<br>oncogenes (CDON)                                                      | 3986 | 0.48 | 11 |
| 4 | ENST00000227589 | NM_012124 | cysteine and histidine-rich domain (CHORD)-containing,<br>zinc binding protein 1 (CHORDC1)                                | 1955 | 0.35 | 11 |
| 4 | ENST00000260045 | NM_004705 | protein-kinase, interferon-inducible double stranded RNA<br>dependent inhibitor, repressor of (P58 repressor)<br>(PRKRIR) | 2250 | 0.41 | 11 |
| 4 | ENST00000263562 | NM_020150 | SAR1 protein (SAR1)                                                                                                       | 662  | 0.43 | 10 |
| 4 | ENST00000263965 | NM_016331 | zinc finger protein ANC_2H01 (LOC51193)                                                                                   | 2932 | 0.38 | 3  |
| 4 | ENST00000265782 | NM_004595 | spermine synthase (SMS)                                                                                                   | 1537 | 0.41 | X  |
| 4 | ENST00000215691 | NM_002882 | RAN binding protein 1 (RANBP1)                                                                                            | 591  | 0.51 | 22 |
| 4 | ENST00000217137 | NM_016045 | chromosome 20 open reading frame 45 (C20orf45)                                                                            | 609  | 0.44 | 20 |
| 3 | ENST00000263258 | NM_000146 | ferritin, light polypeptide (FTL)                                                                                         | 822  | 0.56 | 19 |
| 3 | ENST00000252487 | NM_006114 | translocase of outer mitochondrial membrane 40 homolog<br>(yeast) (TOMM40)                                                | 1687 | 0.63 | 19 |
| 3 | ENST00000237500 | NM_033546 | myosin regulatory light chain (MLC-B)                                                                                     | 519  | 0.46 | 18 |

|   |                 |           |                                                                                                          |      |      |    |
|---|-----------------|-----------|----------------------------------------------------------------------------------------------------------|------|------|----|
| 3 | ENST00000225344 | NM_002512 | non-metastatic cells 2, protein (NM23B) expressed in (NME2), nuclear gene encoding mitochondrial protein | 649  | 0.54 | 17 |
| 3 | ENST00000225426 | NM_002795 | proteasome (prosome, macropain) subunit, beta type, 3 (PSMB3)                                            | 613  | 0.55 | 17 |
| 3 | ENST00000219169 | NM_005796 | nuclear transport factor 2 (NUTF2)                                                                       | 817  | 0.48 | 16 |
| 3 | ENST00000259332 | NM_003329 | thioredoxin (TXN)                                                                                        | 425  | 0.37 | 9  |
| 3 | ENST00000261863 | NM_002654 | pyruvate kinase, muscle (PKM2)                                                                           | 2178 | 0.56 | 15 |
| 3 | ENST00000256544 | NM_024713 | hypothetical protein FLJ22557 (FLJ22557)                                                                 | 882  | 0.37 | 15 |
| 3 | ENST00000216407 | NM_002806 | proteasome (prosome, macropain) 26S subunit, ATPase, 6 (PSMC6)                                           | 1167 | 0.41 | 14 |
| 3 | ENST00000255977 | NM_013446 | makorin, ring finger protein, 1 (MKRN1)                                                                  | 3028 | 0.48 | 7  |
| 3 | ENST00000222968 | NM_014891 | PDGFA associated protein 1 (PDAP1)                                                                       | 807  | 0.55 | 7  |
| 3 | ENST00000248606 | NM_005395 | postmeiotic segregation increased 2-like 9 (PMS2L9)                                                      | 1214 | 0.54 | 7  |
| 3 | ENST00000223321 | NM_002787 | proteasome (prosome, macropain) subunit, alpha type, 2 (PSMA2)                                           | 830  | 0.4  | 7  |
| 3 | ENST00000158302 | NM_001101 | actin, beta (ACTB)                                                                                       | 1798 | 0.55 | 7  |
| 3 | ENST00000243227 | NM_001634 | S-adenosylmethionine decarboxylase 1 (AMD1)                                                              | 1557 | 0.41 | 6  |
| 3 | ENST00000252640 | NM_016487 | HSPC230 gene (HSPC230)                                                                                   | 720  | 0.39 | 6  |
| 3 | ENST00000229983 | NM_003463 | protein tyrosine phosphatase type IVA, member 1 (PTP4A1)                                                 | 519  | 0.41 | 6  |
| 3 | ENST00000211475 | NM_001288 | chloride intracellular channel 1 (CLIC1)                                                                 | 967  | 0.52 | 6  |
| 3 | ENST00000261313 | NM_002567 | prostatic binding protein (PBP)                                                                          | 346  | 0.59 | 12 |
| 3 | ENST00000262034 | NM_004077 | citrate synthase (CS), nuclear gene encoding mitochondrial protein                                       | 1359 | 0.51 | 12 |
| 3 | ENST00000229307 | NM_024865 | hypothetical protein FLJ12581 (FLJ12581)                                                                 | 2098 | 0.45 | 12 |
| 3 | ENST00000265100 | NM_016093 | ribosomal protein L26-like 1 (RPL26L1)                                                                   | 435  | 0.49 | 5  |
| 3 | ENST00000263672 | NM_014752 | KIAA0102 gene product (KIAA0102)                                                                         | 1390 | 0.39 | 11 |
| 3 | ENST00000244891 | NM_032681 | tripartite motif-containing 51 (TRIM51)                                                                  | 846  | 0.46 | 11 |
| 3 | ENST00000224242 | NM_000274 | ornithine aminotransferase (gyrate atrophy) (OAT), nuclear gene encoding mitochondrial protein           | 1991 | 0.4  | 10 |
| 3 | ENST00000199674 | NM_012247 | selenophosphate synthetase (SPS)                                                                         | 1222 | 0.53 | 10 |
| 3 | ENST00000256869 | NM_006450 | NM_032905hypothetical protein MGC14439 (MGC14439)                                                        | 1203 | 0.48 | 10 |
| 3 | ENST00000265260 | NM_020357 | PEST-containing nuclear protein (PCNP)                                                                   | 534  | 0.46 | 3  |
| 3 | ENST00000260986 | NM_000998 | ribosomal protein L37a (RPL37A)                                                                          | 366  | 0.51 | 2  |
| 3 | ENST00000233893 | NM_002157 | heat shock 10kDa protein 1 (chaperonin 10) (HSPE1)                                                       | 538  | 0.38 | 2  |

|   |                 |           |                                                                                                                 |      |      |    |
|---|-----------------|-----------|-----------------------------------------------------------------------------------------------------------------|------|------|----|
| 3 | ENST00000258424 | NM_001862 | cytochrome c oxidase subunit Vb (COX5B), nuclear gene encoding mitochondrial protein                            | 476  | 0.57 | 2  |
| 3 | ENST00000254644 | NM_016622 | mitochondrial ribosomal protein L35 (MRPL35), nuclear gene encoding mitochondrial protein, transcript variant 1 | 683  | 0.4  | 2  |
| 3 | ENST00000260638 | NM_004161 | RAB1A, member RAS oncogene family (RAB1A)                                                                       | 650  | 0.42 | 2  |
| 3 | ENST00000238738 | NM_012249 | ras-like protein TC10 (TC10)                                                                                    | 644  | 0.49 | 2  |
| 3 | ENST00000261456 | NM_002497 | NIMA (never in mitosis gene a)-related kinase 2 (NEK2)                                                          | 2120 | 0.42 | 1  |
| 3 | ENST00000264529 | NM_014827 | KIAA0663 gene product (KIAA0663)                                                                                | 3852 | 0.42 | 1  |
| 3 | ENST00000258299 | NM_002065 | glutamate-ammonia ligase (glutamine synthase) (GLUL)                                                            | 1263 | 0.53 | 1  |
| 3 | ENST00000263168 | NM_006135 | capping protein (actin filament) muscle Z-line, alpha 1 (CAPZA1)                                                | 2354 | 0.38 | 1  |
| 3 | ENST00000234698 | NM_007260 | lysophospholipase II (LYPLA2)                                                                                   | 1534 | 0.61 | 1  |
| 3 | ENST00000253484 | NM_001866 | cytochrome c oxidase subunit VIIb (COX7B), nuclear gene encoding mitochondrial protein                          | 327  | 0.39 | X  |
| 3 | ENST00000203110 | NM_001551 | immunoglobulin (CD79A) binding protein 1 (IGBP1)                                                                | 1321 | 0.48 | X  |
| 3 | ENST00000006617 | NM_078628 | male-specific lethal 3-like 1 (Drosophila) (MSL3L1), transcript variant 4                                       | 2343 | 0.46 | X  |
| 3 | ENST00000262721 | NM_007172 | NM_153684nucleoporin 50kDa (NUP50), transcript variant 2                                                        | 1582 | 0.44 | 22 |
| 3 | ENST00000216261 | NM_001469 | thyroid autoantigen 70kDa (Ku antigen) (G22P1)                                                                  | 2053 | 0.48 | 22 |
| 3 | ENST00000216218 | NM_003932 | suppression of tumorigenicity 13 (colon carcinoma) (Hsp70 interacting protein) (ST13)                           | 3053 | 0.39 | 22 |
| 3 | ENST00000217426 | NM_000687 | S-adenosylhomocysteine hydrolase (AHCY)                                                                         | 2039 | 0.55 | 20 |
| 2 | ENST00000262262 | NM_001772 | CD33 antigen (gp67) (CD33)                                                                                      | 1092 | 0.56 | 19 |
| 2 | ENST00000160740 | NM_015125 | capicua homolog (Drosophila) (CIC)                                                                              | 4359 | 0.66 | 19 |
| 2 | ENST00000221804 | NM_001828 | Charot-Leyden crystal protein (CLC)                                                                             | 544  | 0.45 | 19 |
| 2 | ENST00000251453 | NM_001020 | ribosomal protein S16 (RPS16)                                                                                   | 534  | 0.55 | 19 |
| 2 | ENST00000221419 | NM_001533 | heterogeneous nuclear ribonucleoprotein L (HNRPL)                                                               | 2041 | 0.53 | 19 |
| 2 | ENST00000253105 | NM_024292 | ubiquitin-like 5 (UBL5)                                                                                         | 219  | 0.48 | 19 |
| 2 | ENST00000262948 | NM_030662 | mitogen-activated protein kinase kinase 2 (MAP2K2)                                                              | 1273 | 0.63 | 19 |
| 2 | ENST00000019317 | NM_006788 | ralA binding protein 1 (RALBP1)                                                                                 | 3691 | 0.48 | 18 |
| 2 | ENST00000226090 | NM_002734 | protein kinase, cAMP-dependent, regulatory, type I, alpha (tissue specific extinguisher 1) (PRKAR1A)            | 969  | 0.46 | 17 |
| 2 | ENST00000226078 | NM_016627 | hypothetical protein LOC51321 (LOC51321)                                                                        | 1192 | 0.42 | 17 |
| 2 | ENST00000200620 | NM_002805 | proteasome (prosome, macropain) 26S subunit, ATPase, 5 (PSMC5)                                                  | 1250 | 0.51 | 17 |

|   |                 |           |                                                                                                             |      |      |    |
|---|-----------------|-----------|-------------------------------------------------------------------------------------------------------------|------|------|----|
| 2 | ENST00000251413 | NM_001070 | tubulin, gamma 1 (TUBG1)                                                                                    | 1565 | 0.57 | 17 |
| 2 | ENST00000225901 | NM_002276 | keratin 19 (KRT19)                                                                                          | 1357 | 0.62 | 17 |
| 2 | ENST00000250056 | NM_019013 | hypothetical protein FLJ10156 (FLJ10156)                                                                    | 1470 | 0.56 | 17 |
| 2 | ENST00000225698 | NM_001212 | complement component 1, q subcomponent binding protein (C1QBP), nuclear gene encoding mitochondrial protein | 1083 | 0.49 | 17 |
| 2 | ENST00000225655 | NM_005022 | profilin 1 (PFN1)                                                                                           | 793  | 0.58 | 17 |
| 2 | ENST00000262306 | NM_007108 | transcription elongation factor B (SIII), polypeptide 2 (18kDa, elongin B) (TCEB2)                          | 357  | 0.61 | 16 |
| 2 | ENST00000248139 | NM_021168 | RAB40C, member RAS oncogene family (RAB40C)                                                                 | 708  | 0.63 | 16 |
| 2 | ENST00000238274 | NM_003011 | NM_003011SET translocation (myeloid leukemia-associated) (SET)                                              | 666  | 0.41 | 9  |
| 2 | ENST00000265959 | NM_005347 | heat shock 70kDa protein 5 (glucose-regulated protein, 78kDa) (HSPA5)                                       | 1956 | 0.47 | 9  |
| 2 | ENST00000259393 | NM_001859 | solute carrier family 31 (copper transporters), member 1 (SLC31A1)                                          | 1686 | 0.45 | 9  |
| 2 | ENST00000265659 | NM_003671 | CDC14 cell division cycle 14 homolog B ( <i>S. cerevisiae</i> ) (CDC14B), transcript variant 1              | 1191 | 0.41 | 9  |
| 2 | ENST00000257521 | NM_058179 | phosphoserine aminotransferase (PSA), transcript variant 1                                                  | 1032 | 0.47 | 9  |
| 2 | ENST00000242271 | NM_001539 | DnaJ (Hsp40) homolog, subfamily A, member 1 (DNAJA1)                                                        | 1368 | 0.42 | 9  |
| 2 | ENST00000261881 | NM_017858 | hypothetical protein FLJ20516 (FLJ20516)                                                                    | 1049 | 0.39 | 15 |
| 2 | ENST00000261520 | NM_024611 | similar to NMDA receptor-regulated gene 2 (mouse) (FLJ11896)                                                | 1701 | 0.37 | 15 |
| 2 | ENST00000261845 | NM_002748 | mitogen-activated protein kinase 6 (MAPK6)                                                                  | 3428 | 0.37 | 15 |
| 2 | ENST00000263792 | NM_007236 | calcium binding protein P22 (CHP)                                                                           | 620  | 0.49 | 15 |
| 2 | ENST00000262208 | NM_018299 | hypothetical protein FLJ11011 (FLJ11011)                                                                    | 426  | 0.38 | 8  |
| 2 | ENST00000260130 | NM_005625 | syndecan binding protein (syntenin) (SDCBP)                                                                 | 2015 | 0.38 | 8  |
| 2 | ENST00000265574 | NM_006330 | lysophospholipase I (LYPLA1)                                                                                | 627  | 0.51 | 8  |
| 2 | ENST00000004070 | NM_013354 | CCR4-NOT transcription complex, subunit 7 (CNOT7), transcript variant 1                                     | 1276 | 0.43 | 8  |
| 2 | ENST00000216463 | NM_012460 | translocase of inner mitochondrial membrane 9 homolog (yeast) (TIMM9)                                       | 267  | 0.39 | 14 |
| 2 | ENST00000216727 | NM_004643 | poly(A) binding protein, nuclear 1 (PABPN1)                                                                 | 918  | 0.63 | 14 |
| 2 | ENST00000216705 | NM_021178 | enhancer of invasion 10 (HEI10)                                                                             | 1166 | 0.45 | 14 |
| 2 | ENST00000265304 | NM_003143 | single-stranded DNA binding protein (SSBP1)                                                                 | 378  | 0.43 | 7  |

|   |                 |           |                                                                                      |      |      |    |
|---|-----------------|-----------|--------------------------------------------------------------------------------------|------|------|----|
| 2 | ENST00000007616 | NM_018238 | hypothetical protein FLJ10842 (FLJ10842)                                             | 696  | 0.5  | 7  |
| 2 | ENST00000262570 | NM_017812 | hypothetical protein FLJ20420 (FLJ20420)                                             | 660  | 0.51 | 7  |
| 2 | ENST00000003100 | NM_000786 | cytochrome P450, 51 (lanosterol 14-alpha-demethylase)<br>(CYP51)                     | 3043 | 0.4  | 7  |
| 2 | ENST00000254768 | NM_014302 | Sec61 gamma (SEC61G)                                                                 | 206  | 0.39 | 7  |
| 2 | ENST00000005374 | NM_024051 | hypothetical protein MGC3077 (MGC3077)                                               | 564  | 0.44 | 7  |
| 2 | ENST00000242129 | NM_016587 | chromobox homolog 3 (HP1 gamma homolog,<br>Drosophila) (CBX3), transcript variant 2  | 1668 | 0.34 | 7  |
| 2 | ENST00000056233 | NM_004289 | nuclear factor (erythroid-derived 2)-like 3 (NFE2L3)                                 | 2082 | 0.5  | 7  |
| 2 | ENST00000223129 | NM_002947 | replication protein A3, 14kDa (RPA3)                                                 | 681  | 0.4  | 7  |
| 2 | ENST00000158301 | NM_003088 | fascin homolog 1, actin-bundling protein<br>(Strongylocentrotus purpuratus) (FSCN1)  | 1491 | 0.66 | 7  |
| 2 | ENST00000218883 | NM_006437 | ADP-ribosyltransferase (NAD+; poly (ADP-ribose)<br>polymerase)-like 1 (ADPRTL1)      | 5469 | 0.45 | 13 |
| 2 | ENST00000255310 | NM_130785 | TPTE and PTEN homologous inositol lipid phosphatase<br>(TPIP)                        | 1641 | 0.38 | 13 |
| 2 | ENST00000195656 | NM_020466 | hypothetical protein dJ12208.2 (DJ12208.2)                                           | 264  | 0.42 | 6  |
| 2 | ENST00000244437 | NM_003017 | splicing factor, arginine/serine-rich 3 (SFRS3)                                      | 1336 | 0.4  | 6  |
| 2 | ENST00000244520 | NM_003093 | small nuclear ribonucleoprotein polypeptide C (SNRPC)                                | 698  | 0.5  | 6  |
| 2 | ENST00000244487 | NM_020662 | MRS2-like, magnesium homeostasis factor ( <i>S. cerevisiae</i> )<br>(MRS2L)          | 1900 | 0.42 | 6  |
| 2 | ENST00000242577 | NM_003746 | dynein, cytoplasmic, light polypeptide 1 (DNCL1)                                     | 640  | 0.46 | 12 |
| 2 | ENST00000229390 | NM_003769 | splicing factor, arginine/serine-rich 9 (SFRS9)                                      | 1069 | 0.5  | 12 |
| 2 | ENST00000261318 | NM_024738 | hypothetical protein FLJ21415 (FLJ21415)                                             | 615  | 0.57 | 12 |
| 2 | ENST00000261728 | NM_002834 | protein tyrosine phosphatase, non-receptor type 11<br>(PTPN11), transcript variant 1 | 2375 | 0.42 | 12 |
| 2 | ENST00000242591 | NM_031473 | carnitine deficiency-associated gene expressed in ventricle<br>1 (CDV-1)             | 507  | 0.4  | 12 |
| 2 | ENST00000262033 | NM_006601 | inactive progesterone receptor, 23 kD (TEBP)                                         | 441  | 0.37 | 12 |
| 2 | ENST00000262049 | NM_031989 | poly(rC) binding protein 2 (PCBP2), transcript variant 2                             | 1053 | 0.51 | 12 |
| 2 | ENST00000229319 | NM_002300 | lactate dehydrogenase B (LDHB)                                                       | 1221 | 0.42 | 12 |
| 2 | ENST00000025399 | NM_007178 | unr-interacting protein (UNRIP)                                                      | 1855 | 0.44 | 12 |
| 2 | ENST00000261167 | NM_016312 | WW domain binding protein 11 (WBP11)                                                 | 1743 | 0.48 | 12 |
| 2 | ENST00000261809 | NM_004290 | ring finger protein 14 (RNF14)                                                       | 1670 | 0.44 | 5  |
| 2 | ENST00000231283 | NM_006467 | polymerase (RNA) III (DNA directed) (32kD) (RPC32)                                   | 786  | 0.36 | 5  |
| 2 | ENST00000247655 | NM_001867 | cytochrome c oxidase subunit VIIc (COX7C), nuclear                                   | 189  | 0.47 | 5  |

|   |                 |           |                                                                                                                                                                |      |      |    |
|---|-----------------|-----------|----------------------------------------------------------------------------------------------------------------------------------------------------------------|------|------|----|
|   |                 |           | gene encoding mitochondrial protein                                                                                                                            |      |      |    |
| 2 | ENST00000256441 | NM_033281 | mitochondrial ribosomal protein S36 (MRPS36), nuclear                                                                                                          | 252  | 0.38 | 5  |
|   |                 |           | gene encoding mitochondrial protein                                                                                                                            |      |      |    |
| 2 | ENST00000264938 | NM_004174 | solute carrier family 9 (sodium/hydrogen exchanger),<br>isoform 3 (SLC9A3)                                                                                     | 2088 | 0.61 | 5  |
| 2 | ENST00000227322 | NM_003904 | zinc finger protein 259 (ZNF259)                                                                                                                               | 1765 | 0.52 | 11 |
| 2 | ENST00000164139 | NM_005609 | phosphorylase, glycogen; muscle (McArdle syndrome,<br>glycogen storage disease type V) (PYGM)                                                                  | 2526 | 0.57 | 11 |
| 2 | ENST00000228136 | NM_014267 | small acidic protein (SMAP)                                                                                                                                    | 795  | 0.4  | 11 |
| 2 | ENST00000241895 | NM_032333 | hypothetical protein MGC4248 (MGC4248)                                                                                                                         | 648  | 0.5  | 10 |
| 2 | ENST00000260862 | NM_005437 | nuclear receptor coactivator 4 (NCOA4)                                                                                                                         | 1982 | 0.48 | 10 |
| 2 | ENST00000261438 | NM_016531 | Kruppel-like factor 3 (basic) (KLF3)                                                                                                                           | 1264 | 0.5  | 4  |
| 2 | ENST00000184266 | NM_004547 | NADH dehydrogenase (ubiquinone) 1 beta subcomplex, 4,<br>15kDa (NDUFB4)                                                                                        | 453  | 0.46 | 3  |
| 2 | ENST00000261015 | NM_018256 | WD repeat domain 12 (WDR12)                                                                                                                                    | 1707 | 0.42 | 2  |
| 2 | ENST00000261002 | NM_013341 | hypothetical protein PTD004 (PTD004)                                                                                                                           | 810  | 0.38 | 2  |
| 2 | ENST00000260953 | NM_014168 | HSPC133 protein (HSPC133)                                                                                                                                      | 708  | 0.41 | 2  |
| 2 | ENST00000179706 | NM_006001 | tubulin, alpha 2 (TUBA2), transcript variant 1                                                                                                                 | 1278 | 0.58 | 2  |
| 2 | ENST00000263238 | NM_005721 | ARP3 actin-related protein 3 homolog (yeast) (ACTR3)                                                                                                           | 1209 | 0.41 | 2  |
| 2 | ENST00000264090 | NM_006636 | methylene tetrahydrofolate dehydrogenase (NAD+<br>dependent), methenyltetrahydrofolate cyclohydrolase<br>(MTHFD2), nuclear gene encoding mitochondrial protein | 2085 | 0.41 | 2  |
| 2 | ENST00000233114 | NM_005917 | malate dehydrogenase 1, NAD (soluble) (MDH1)                                                                                                                   | 1221 | 0.43 | 2  |
| 2 | ENST00000233836 | NM_006430 | chaperonin containing TCP1, subunit 4 (delta) (CCT4)                                                                                                           | 945  | 0.41 | 2  |
| 2 | ENST00000234111 | NM_002539 | ornithine decarboxylase 1 (ODC1)                                                                                                                               | 1383 | 0.47 | 2  |
| 2 | ENST00000263288 | NM_003564 | transgelin 2 (TAGLN2)                                                                                                                                          | 1316 | 0.56 | 1  |
| 2 | ENST00000235108 | NM_002884 | RAP1A, member of RAS oncogene family (RAP1A)                                                                                                                   | 1267 | 0.35 | 1  |
| 2 | ENST00000235880 | NM_002053 | guanylate binding protein 1, interferon-inducible, 67kDa<br>(GBP1)                                                                                             | 1776 | 0.48 | 1  |
| 2 | ENST00000257181 | NM_032284 | hypothetical protein FLJ14936 (FLJ14936)                                                                                                                       | 708  | 0.51 | 1  |
| 2 | ENST00000257184 | NM_032284 | hypothetical protein FLJ14936 (FLJ14936)                                                                                                                       | 165  | 0.47 | 1  |
| 2 | ENST00000163282 | NM_004559 | nuclease sensitive element binding protein 1 (NSEP1)                                                                                                           | 1551 | 0.5  | 1  |
| 2 | ENST00000254231 | NM_024674 | RNA-binding protein LIN-28 (LIN-28)                                                                                                                            | 627  | 0.6  | 1  |
| 2 | ENST00000263697 | NM_014280 | DnaJ (Hsp40) homolog, subfamily C, member 8<br>(DNAJC8)                                                                                                        | 681  | 0.44 | 1  |
| 2 | ENST00000062038 | NM_016183 | chromosome 1 open reading frame 33 (C1orf33)                                                                                                                   | 858  | 0.53 | 1  |



|   |                 |           |                                                                                |      |      |    |
|---|-----------------|-----------|--------------------------------------------------------------------------------|------|------|----|
| 2 | ENST00000234590 | NM_001428 | enolase 1, (alpha) (ENO1)                                                      | 1661 | 0.54 | 1  |
| 2 | ENST00000234912 | NM_007262 | RNA-binding protein regulatory subunit (DJ-1)                                  | 798  | 0.47 | 1  |
| 2 | ENST00000216254 | NM_001098 | aconitase 2, mitochondrial (ACO2), nuclear gene encoding mitochondrial protein | 2674 | 0.56 | 22 |
| 2 | ENST00000249003 | NM_001675 | activating transcription factor 4 (tax-responsive enhancer element B67) (ATF4) | 2016 | 0.57 | 22 |
| 2 | ENST00000215830 | NM_014303 | pescadillo homolog 1, containing BRCT domain (zebrafish) (PES1)                | 2156 | 0.58 | 22 |
| 2 | ENST00000248923 | NM_013421 | NM_013421gamma-glutamyltransferase 1 (GGT1), transcript variant 2              | 2532 | 0.62 | 22 |
| 2 | ENST00000253413 | NM_001696 | ATPase, H+ transporting, lysosomal 31kDa, V1 subunit E isoform 1 (ATP6V1E1)    | 645  | 0.44 | 22 |
| 2 | ENST00000217103 | NM_002623 | prefoldin 4 (PFDN4)                                                            | 378  | 0.36 | 20 |
| 2 | ENST00000243893 | NM_007019 | ubiquitin-conjugating enzyme E2C (UBE2C)                                       | 771  | 0.5  | 20 |
| 2 | ENST00000217343 | NM_022077 | mannosidase, beta A, lysosomal-like (MANBAL)                                   | 255  | 0.58 | 20 |
| 2 | ENST00000202834 | NM_014145 | chromosome 20 open reading frame 30 (C20orf30)                                 | 467  | 0.57 | 20 |
| 2 | ENST00000217195 | NM_017874 | chromosome 20 open reading frame 27 (C20orf27)                                 | 1052 | 0.62 | 20 |
| 1 | ENST00000221557 | NM_017432 | prostate tumor over expressed gene 1 (PTOV1)                                   | 1224 | 0.64 | 19 |
| 1 | ENST00000221498 | NM_014419 | soggy-1 gene (DKKL1-pending)                                                   | 820  | 0.6  | 19 |
| 1 | ENST00000253237 | NM_031485 | glutamate rich WD repeat protein GRWD (GRWD)                                   | 1338 | 0.64 | 19 |
| 1 | ENST00000222073 | NM_012451 | synaptogyrin 4 (SYNGR4)                                                        | 872  | 0.59 | 19 |
| 1 | ENST00000221986 | NM_003009 | selenoprotein W, 1 (SEPW1)                                                     | 624  | 0.54 | 19 |
| 1 | ENST00000246802 | NM_015710 | glioma tumor suppressor candidate region gene 2 (GLTSCR2)                      | 4183 | 0.61 | 19 |
| 1 | ENST00000253047 | NM_017854 | hypothetical protein FLJ20512 (FLJ20512)                                       | 655  | 0.72 | 19 |
| 1 | ENST00000245922 | NM_004597 | small nuclear ribonucleoprotein D2 polypeptide 16.5kDa (SNRPD2)                | 458  | 0.53 | 19 |
| 1 | ENST00000252491 | NM_001645 | apolipoprotein C-I (APOC1)                                                     | 249  | 0.54 | 19 |
| 1 | ENST00000252486 | NM_000041 | apolipoprotein E (APOE)                                                        | 1096 | 0.69 | 19 |
| 1 | ENST00000244293 | NM_002784 | pregnancy specific beta-1-glycoprotein 9 (PSG9)                                | 1323 | 0.49 | 19 |
| 1 | ENST00000251275 | NM_031246 | pregnancy specific beta-1-glycoprotein 2 (PSG2)                                | 1505 | 0.45 | 19 |
| 1 | ENST00000222329 | NM_006494 | Ets2 repressor factor (ERF)                                                    | 2665 | 0.64 | 19 |
| 1 | ENST00000221999 | NM_001815 | carcinoembryonic antigen-related cell adhesion molecule 3 (CEACAM3)            | 1136 | 0.57 | 19 |
| 1 | ENST00000012497 | NM_020129 | placental protein 13-like protein (PPL13)                                      | 774  | 0.47 | 19 |
| 1 | ENST00000215071 | NM_002812 | proteasome (prosome, macropain) 26S subunit,                                   | 928  | 0.57 | 19 |

|   |                 |           |                                                                                                                |      |      |    |
|---|-----------------|-----------|----------------------------------------------------------------------------------------------------------------|------|------|----|
|   |                 |           | non-ATPase, 8 (PSMD8)                                                                                          |      |      |    |
| 1 | ENST00000246554 | NM_001863 | cytochrome c oxidase subunit VIb (COX6B), nuclear gene<br>encoding mitochondrial protein                       | 414  | 0.54 | 19 |
| 1 | ENST00000254260 | NM_033103 | rhopilin-2 (RHPN2)                                                                                             | 1671 | 0.55 | 19 |
| 1 | ENST00000222308 | NM_012181 | FK506 binding protein 8, 38kDa (FKBP8)                                                                         | 1589 | 0.65 | 19 |
| 1 | ENST00000222262 | NM_016368 | myo-inositol 1-phosphate synthase A1 (ISYNA1)                                                                  | 1825 | 0.65 | 19 |
| 1 | ENST00000263384 | NM_014077 | DKFZP586O0120 protein (DKFZP586O0120)                                                                          | 1449 | 0.52 | 19 |
| 1 | ENST00000248041 | NM_021187 | cytochrome P450, subfamily IVF, polypeptide 11<br>(CYP4F11)                                                    | 1739 | 0.56 | 19 |
| 1 | ENST00000242776 | NM_138998 | DEAD/H (Asp-Glu-Ala-Asp/His) box polypeptide 39<br>(DDX39), transcript variant 2                               | 1408 | 0.56 | 19 |
| 1 | ENST00000221504 | NM_017722 | hypothetical protein FLJ20244 (FLJ20244)                                                                       | 2096 | 0.61 | 19 |
| 1 | ENST00000222214 | NM_013976 | glutaryl-Coenzyme A dehydrogenase (GCDH), nuclear<br>gene encoding mitochondrial protein, transcript variant 2 | 1780 | 0.59 | 19 |
| 1 | ENST00000247970 | NM_006221 | protein (peptidyl-prolyl cis/trans isomerase)<br>NIMA-interacting 1 (PIN1)                                     | 973  | 0.64 | 19 |
| 1 | ENST00000253115 | NM_024106 | hypothetical protein MGC2663 (MGC2663)                                                                         | 1638 | 0.43 | 19 |
| 1 | ENST00000252840 | NM_024341 | hypothetical protein MGC4054 (MGC4054)                                                                         | 1116 | 0.46 | 19 |
| 1 | ENST00000252841 | NM_139161 | crumbs 3 (CRB3)                                                                                                | 372  | 0.64 | 19 |
| 1 | ENST00000221847 | NM_005755 | Epstein-Barr virus induced gene 3 (EBI3)                                                                       | 1130 | 0.59 | 19 |
| 1 | ENST00000078429 | NM_002067 | guanine nucleotide binding protein (G protein), alpha 11<br>(Gq class) (GNA11)                                 | 1532 | 0.63 | 19 |
| 1 | ENST00000221501 | NM_004152 | ornithine decarboxylase antizyme 1 (OAZ1)                                                                      | 681  | 0.59 | 19 |
| 1 | ENST00000221494 | NM_007165 | splicing factor 3a, subunit 2, 66kDa (SF3A2)                                                                   | 1395 | 0.68 | 19 |
| 1 | ENST00000217537 | NM_014643 | KIAA0222 gene product (KIAA0222)                                                                               | 5872 | 0.57 | 18 |
| 1 | ENST00000262093 | NM_000140 | ferrochelatase (protoporphyrin) (FECH), nuclear gene<br>encoding mitochondrial protein                         | 2411 | 0.46 | 18 |
| 1 | ENST00000261287 | NM_002396 | malic enzyme 2, NAD(+)-dependent, mitochondrial<br>(ME2), nuclear gene encoding mitochondrial protein          | 1619 | 0.4  | 18 |
| 1 | ENST00000261593 | NM_016271 | STRIN protein (STRIN)                                                                                          | 2071 | 0.34 | 18 |
| 1 | ENST00000217602 | NM_003574 | VAMP (vesicle-associated membrane protein)-associated<br>protein A, 33kDa (VAPA)                               | 684  | 0.4  | 18 |
| 1 | ENST00000225777 | NM_004710 | synaptogyrin 2 (SYNGR2)                                                                                        | 675  | 0.62 | 17 |
| 1 | ENST00000246907 | NM_007299 | breast cancer 1, early onset (BRCA1), transcript variant<br>BRCA1-delta14-17                                   | 4800 | 0.41 | 17 |
| 1 | ENST00000258963 | NM_007146 | zinc finger protein 161 (ZNF161)                                                                               | 2254 | 0.44 | 17 |

|   |                 |           |                                                                                       |      |      |    |
|---|-----------------|-----------|---------------------------------------------------------------------------------------|------|------|----|
| 1 | ENST00000240316 | NM_004645 | coilin (COIL)                                                                         | 2622 | 0.43 | 17 |
| 1 | ENST00000225298 | NM_016001 | CGI-48 protein (CGI-48)                                                               | 1873 | 0.46 | 17 |
| 1 | ENST00000225603 | NM_006807 | chromobox homolog 1 (HP1 beta homolog Drosophila )<br>(CBX1)                          | 1971 | 0.44 | 17 |
| 1 | ENST00000258958 | NM_016632 | ARF protein (LOC51326)                                                                | 1073 | 0.43 | 17 |
| 1 | ENST00000246646 | NM_006771 | keratin, hair, acidic, 8 (KRTHA8)                                                     | 1368 | 0.6  | 17 |
| 1 | ENST00000251648 | NM_021013 | keratin, hair, acidic, 4 (KRTHA4)                                                     | 1182 | 0.6  | 17 |
| 1 | ENST00000225873 | NM_000286 | peroxisomal biogenesis factor 12 (PEX12)                                              | 1077 | 0.47 | 17 |
| 1 | ENST00000261713 | NM_015544 | DKFZP564K1964 protein (DKFZP564K1964)                                                 | 1469 | 0.51 | 17 |
| 1 | ENST00000009388 | NM_003457 | zinc finger protein 207 (ZNF207)                                                      | 2273 | 0.45 | 17 |
| 1 | ENST00000261708 | NM_018428 | hepatocellular carcinoma-associated antigen 66 (HCA66)                                | 1980 | 0.43 | 17 |
| 1 | ENST00000225387 | NM_005208 | crystallin, beta A1 (CRYBA1)                                                          | 646  | 0.5  | 17 |
| 1 | ENST00000261498 | NM_004169 | serine hydroxymethyltransferase 1 (soluble) (SHMT1),<br>transcript variant 1          | 1813 | 0.55 | 17 |
| 1 | ENST00000262445 | NM_003010 | mitogen-activated protein kinase kinase 4 (MAP2K4)                                    | 3576 | 0.42 | 17 |
| 1 | ENST00000005356 | NM_015343 | likely ortholog of Xenopus dullard (HSA011916)                                        | 1356 | 0.54 | 17 |
| 1 | ENST00000007699 | NM_015982 | germ cell specific Y-box binding protein (YBX2)                                       | 1570 | 0.63 | 17 |
| 1 | ENST00000250101 | NM_032731 | hypothetical protein MGC14353 (MGC14353)                                              | 369  | 0.5  | 17 |
| 1 | ENST00000158771 | NM_016041 | CGI-101 protein (F-LAN-1)                                                             | 1119 | 0.43 | 17 |
| 1 | ENST00000261621 | NM_052988 | cyclin-dependent kinase (CDC2-like) 10 (CDK10),<br>transcript variant 3               | 1733 | 0.61 | 16 |
| 1 | ENST00000253462 | NM_016095 | HSPC037 protein (LOC51659)                                                            | 1139 | 0.52 | 16 |
| 1 | ENST00000219313 | NM_002811 | proteasome (prosome, macropain) 26S subunit,<br>non-ATPase, 7 (Mov34 homolog) (PSMD7) | 1595 | 0.45 | 16 |
| 1 | ENST00000254950 | NM_013245 | vacuolar protein sorting 4A (yeast) (VPS4A)                                           | 2030 | 0.56 | 16 |
| 1 | ENST00000219235 | NM_002990 | chemokine (C-C motif) ligand 22 (CCL22)                                               | 2905 | 0.53 | 16 |
| 1 | ENST00000262510 | NM_032206 | hypothetical protein FLJ21709 (FLJ21709)                                              | 2091 | 0.59 | 16 |
| 1 | ENST00000007516 | NM_005003 | NADH dehydrogenase (ubiquinone) 1, alpha/beta<br>subcomplex, 1, 8kDa (NDUFAB1)        | 663  | 0.48 | 16 |
| 1 | ENST00000241753 | NM_031211 | LAT1-3TM protein (LAT1-3TM)                                                           | 1731 | 0.44 | 16 |
| 1 | ENST00000198767 | NM_018427 | RNA polymerase I transcription factor RRN3 (RRN3)                                     | 2021 | 0.45 | 16 |
| 1 | ENST00000176236 | NM_001424 | epithelial membrane protein 2 (EMP2)                                                  | 626  | 0.48 | 16 |
| 1 | ENST00000161015 | NM_032296 | hypothetical protein DKFZp761A132 (DKFZp761A132)                                      | 2181 | 0.68 | 16 |
| 1 | ENST00000253953 | NM_032271 | hypothetical protein DKFZp586I021 (DKFZp586I021)                                      | 1986 | 0.61 | 16 |
| 1 | ENST00000219302 | NM_002513 | non-metastatic cells 3, protein expressed in (NME3)                                   | 833  | 0.65 | 16 |
| 1 | ENST00000259342 | NM_016482 | hepatocellular carcinoma-associated antigen 59                                        | 1763 | 0.46 | 9  |

(LOC51759)

|   |                 |           |                                                                              |      |      |    |
|---|-----------------|-----------|------------------------------------------------------------------------------|------|------|----|
| 1 | ENST00000259469 | NM_007209 | ribosomal protein L35 (RPL35)                                                | 369  | 0.57 | 9  |
| 1 | ENST00000259396 | NM_000607 | orosomucoid 1 (ORM1)                                                         | 681  | 0.53 | 9  |
| 1 | ENST00000259397 | NM_000607 | orosomucoid 1 (ORM1)                                                         | 603  | 0.53 | 9  |
| 1 | ENST00000238267 | NM_017832 | hypothetical protein FLJ20457 (FLJ20457)                                     | 1896 | 0.41 | 9  |
| 1 | ENST00000223641 | NM_006808 | protein translocation complex beta (SEC61B)                                  | 334  | 0.55 | 9  |
| 1 | ENST00000243756 | NM_001827 | CDC28 protein kinase regulatory subunit 2 (CKS2)                             | 613  | 0.41 | 9  |
| 1 | ENST00000237946 | NM_012383 | osteoclast stimulating factor 1 (OSTF1)                                      | 670  | 0.43 | 9  |
| 1 | ENST00000237937 | NM_006007 | zinc finger protein 216 (ZNF216)                                             | 639  | 0.45 | 9  |
| 1 | ENST00000254835 | NM_032250 | hypothetical protein DKFZp434A171 (DKFZp434A171)                             | 3520 | 0.38 | 9  |
| 1 | ENST00000262514 | NM_033655 | cell recognition molecule CASPR3 (CASPR3), transcript variant 1              | 876  | 0.47 | 9  |
| 1 | ENST00000259667 | NM_032593 | histidine triad nucleotide binding protein 2 (HINT2)                         | 489  | 0.61 | 9  |
| 1 | ENST00000223500 | NM_016410 | hypothetical protein HSPC177 (HSPC177)                                       | 1188 | 0.39 | 9  |
| 1 | ENST00000224112 | NM_004323 | BCL2-associated athanogene (BAG1)                                            | 1296 | 0.56 | 9  |
| 1 | ENST00000263222 | NM_018225 | homolog of C. elegans smu-1 (SMU-1)                                          | 1655 | 0.44 | 9  |
| 1 | ENST00000265774 | NM_014878 | KIAA0020 gene product (KIAA0020)                                             | 1512 | 0.42 | 9  |
| 1 | ENST00000261884 | NM_016213 | thyroid hormone receptor interactor 4 (TRIP4)                                | 1712 | 0.47 | 15 |
| 1 | ENST00000261879 | NM_031301 | likely ortholog of C. elegans anterior pharynx defective 1B (APH-1B)         | 899  | 0.47 | 15 |
| 1 | ENST00000249822 | NM_006628 | cyclic AMP phosphoprotein, 19 kD (ARPP-19)                                   | 296  | 0.45 | 15 |
| 1 | ENST00000261854 | NM_032802 | putative intramembrane cleaving protease (SPPL2A)                            | 1131 | 0.38 | 15 |
| 1 | ENST00000261843 | NM_005154 | ubiquitin specific protease 8 (USP8)                                         | 4110 | 0.39 | 15 |
| 1 | ENST00000251250 | NM_020234 | x 009 protein (MDS009)                                                       | 726  | 0.35 | 15 |
| 1 | ENST00000260327 | NM_016396 | hypothetical protein HSPC129 (HSPC129)                                       | 1426 | 0.39 | 15 |
| 1 | ENST00000249786 | NM_016400 | Huntingtin interacting protein K (HYPK)                                      | 512  | 0.58 | 15 |
| 1 | ENST00000263798 | NM_006293 | TYRO3 protein tyrosine kinase (TYRO3)                                        | 3623 | 0.58 | 15 |
| 1 | ENST00000260361 | NM_016013 | CGI-65 protein (CIA30)                                                       | 1435 | 0.45 | 15 |
| 1 | ENST00000220496 | NM_018163 | hypothetical protein FLJ10634 (FLJ10634)                                     | 929  | 0.55 | 15 |
| 1 | ENST00000261609 | NM_004667 | hect domain and RLD 2 (HERC2)                                                | 7185 | 0.52 | 15 |
| 1 | ENST00000262583 | NM_013291 | cleavage and polyadenylation specific factor 1, 160kDa (CPSF1)               | 3433 | 0.62 | 8  |
| 1 | ENST00000220577 | NM_003033 | sialyltransferase 4A (beta-galactoside alpha-2,3-sialyltransferase) (SIAT4A) | 2446 | 0.55 | 8  |
| 1 | ENST00000239698 | NM_020189 | DC6 protein (DC6)                                                            | 297  | 0.43 | 8  |
| 1 | ENST00000220849 | NM_001568 | eukaryotic translation initiation factor 3, subunit 6 48kDa                  | 1501 | 0.38 | 8  |

|   |                 |           |                                                                                                                                                       |      |      |    |
|---|-----------------|-----------|-------------------------------------------------------------------------------------------------------------------------------------------------------|------|------|----|
|   |                 |           | (EIF3S6)                                                                                                                                              |      |      |    |
| 1 | ENST00000240201 | NM_016096 | HSPC038 protein (LOC51123)                                                                                                                            | 740  | 0.46 | 8  |
| 1 | ENST00000174661 | NM_002568 | poly(A) binding protein, cytoplasmic 1 (PABPC1)                                                                                                       | 1566 | 0.46 | 8  |
| 1 | ENST00000265428 | NM_007013 | WW domain-containing protein 1 (WWP1)                                                                                                                 | 1467 | 0.41 | 8  |
| 1 | ENST00000262203 | NM_014393 | staufer, RNA binding protein, homolog 2 (Drosophila)<br>(STAU2)                                                                                       | 1125 | 0.43 | 8  |
| 1 | ENST00000262213 | NM_014294 | translocating chain-associating membrane protein (TRAM)                                                                                               | 1122 | 0.41 | 8  |
| 1 | ENST00000262212 | NM_006837 | COP9 constitutive photomorphogenic homolog subunit 5<br>(Arabidopsis) (COPS5)                                                                         | 1281 | 0.44 | 8  |
| 1 | ENST0000022615  | NM_005662 | voltage-dependent anion channel 3 (VDAC3)                                                                                                             | 1287 | 0.43 | 8  |
| 1 | ENST00000174653 | NM_006803 | adaptor-related protein complex 3, mu 2 subunit (AP3M2)                                                                                               | 585  | 0.48 | 8  |
| 1 | ENST00000221138 | NM_004156 | protein phosphatase 2 (formerly 2A), catalytic subunit,<br>beta isoform (PPP2CB)                                                                      | 1522 | 0.4  | 8  |
| 1 | ENST00000221114 | NM_006571 | likely ortholog of mouse dynactin 6 (DCTN6)                                                                                                           | 849  | 0.38 | 8  |
| 1 | ENST00000221200 | NM_017634 | hypothetical protein FLJ20038 (FLJ20038)                                                                                                              | 2506 | 0.36 | 8  |
| 1 | ENST00000252512 | NM_015024 | RAN binding protein 16 (RANBP16)                                                                                                                      | 3261 | 0.48 | 8  |
| 1 | ENST00000221204 | NM_004467 | fibrinogen-like 1 (FGL1), transcript variant 1                                                                                                        | 1138 | 0.42 | 8  |
| 1 | ENST00000163416 | NM_005113 | golgi autoantigen, golgin subfamily a, 5 (GOLGA5)                                                                                                     | 2322 | 0.45 | 14 |
| 1 | ENST00000262004 | NM_005606 | legumain (LGMN)                                                                                                                                       | 1836 | 0.5  | 14 |
| 1 | ENST00000261531 | NM_012245 | SKI-interacting protein (SNW1)                                                                                                                        | 2088 | 0.44 | 14 |
| 1 | ENST00000238688 | NM_031210 | hypothetical protein DC50 (DC50)                                                                                                                      | 367  | 0.45 | 14 |
| 1 | ENST00000238671 | NM_001933 | dihydrolipoamide S-succinyltransferase (E2 component of<br>2-oxo-glutarate complex) (DLST)                                                            | 1853 | 0.5  | 14 |
| 1 | ENST00000256365 | NM_016468 | hypothetical protein LOC51241 (LOC51241)                                                                                                              | 318  | 0.42 | 14 |
| 1 | ENST00000216456 | NM_006370 | vesicle transport through interaction with t-SNAREs<br>homolog 1B (yeast) (VTI1B)                                                                     | 696  | 0.51 | 14 |
| 1 | ENST00000216605 | NM_005956 | methylenetetrahydrofolate dehydrogenase (NADP+<br>dependent), methylenetetrahydrofolate cyclohydrolase,<br>formyltetrahydrofolate synthetase (MTHFD1) | 2772 | 0.49 | 14 |
| 1 | ENST00000216502 | NM_021003 | protein phosphatase 1A (formerly 2C),<br>magnesium-dependent, alpha isoform (PPM1A)                                                                   | 1149 | 0.44 | 14 |
| 1 | ENST00000261247 | NM_016475 | chromosome 14 open reading frame 100 (C14orf100)                                                                                                      | 996  | 0.42 | 14 |
| 1 | ENST00000216455 | NM_002788 | proteasome (prosome, macropain) subunit, alpha type, 3<br>(PSMA3), transcript variant 1                                                               | 812  | 0.39 | 14 |
| 1 | ENST00000216330 | NM_002013 | FK506 binding protein 3, 25kDa (FKBP3)                                                                                                                | 962  | 0.4  | 14 |
| 1 | ENST00000250457 | NM_022073 | egl nine homolog 3 (C. elegans) (EGLN3)                                                                                                               | 687  | 0.57 | 14 |

|   |                 |           |                                                                                                     |      |      |    |
|---|-----------------|-----------|-----------------------------------------------------------------------------------------------------|------|------|----|
| 1 | ENST00000216743 | NM_001173 | Rho GTPase activating protein 5 (ARHGAP5)                                                           | 4690 | 0.37 | 14 |
| 1 | ENST00000216366 | NM_007077 | adaptor-related protein complex 4, sigma 1 subunit (AP4S1)                                          | 493  | 0.37 | 14 |
| 1 | ENST00000206595 | NM_017769 | hypothetical protein FLJ20333 (FLJ20333)                                                            | 5547 | 0.33 | 14 |
| 1 | ENST00000250495 | NM_006156 | neural precursor cell expressed, developmentally down-regulated 8 (NEDD8)                           | 228  | 0.51 | 14 |
| 1 | ENST00000250375 | NM_021004 | dehydrogenase/reductase (SDR family) member 4 (DHRS4)                                               | 780  | 0.59 | 14 |
| 1 | ENST00000206474 | NM_017815 | chromosome 14 open reading frame 94 (C14orf94)                                                      | 1389 | 0.49 | 14 |
| 1 | ENST00000216297 | NM_007192 | suppressor of Ty 16 homolog ( <i>S. cerevisiae</i> ) (SUPT16H)                                      | 4341 | 0.44 | 14 |
| 1 | ENST00000262708 | NM_000270 | nucleoside phosphorylase (NP)                                                                       | 1428 | 0.51 | 14 |
| 1 | ENST00000262187 | NM_005614 | Ras homolog enriched in brain 2 (RHEB2)                                                             | 552  | 0.41 | 7  |
| 1 | ENST00000182065 | NM_003592 | cullin 1 (CUL1)                                                                                     | 2456 | 0.43 | 7  |
| 1 | ENST00000251679 | NM_020299 | aldo-keto reductase family 1, member B10 (aldose reductase) (AKR1B10)                               | 1017 | 0.5  | 7  |
| 1 | ENST00000262943 | NM_012447 | stromal antigen 3 (STAG3)                                                                           | 3485 | 0.54 | 7  |
| 1 | ENST00000252713 | NM_024061 | vav-1 interacting Kruppel-like protein (VIK)                                                        | 543  | 0.55 | 7  |
| 1 | ENST00000175506 | NM_133436 | asparagine synthetase (ASNS), transcript variant 1                                                  | 1992 | 0.44 | 7  |
| 1 | ENST00000248566 | NM_006304 | Deleted in split-hand/split-foot 1 region (DSS1)                                                    | 210  | 0.44 | 7  |
| 1 | ENST00000222547 | NM_005868 | BET1 homolog ( <i>S. cerevisiae</i> ) (BET1)                                                        | 336  | 0.37 | 7  |
| 1 | ENST00000265732 | NM_032120 | hypothetical protein DKFZp564O0523 (DKFZP564O0523)                                                  | 1102 | 0.41 | 7  |
| 1 | ENST00000265728 | NM_006716 | activator of S phase kinase (ASK)                                                                   | 2749 | 0.42 | 7  |
| 1 | ENST00000248553 | NM_001540 | heat shock 27kDa protein 1 (HSPB1)                                                                  | 847  | 0.65 | 7  |
| 1 | ENST00000222690 | NM_138635 | histone H2A.F/Z variant (H2AV), transcript variant 2                                                | 552  | 0.48 | 7  |
| 1 | ENST00000222402 | NM_015983 | ubiquitin-conjugating enzyme HBUCE1 (LOC51619)                                                      | 1292 | 0.5  | 7  |
| 1 | ENST00000005257 | NM_005402 | v-ral simian leukemia viral oncogene homolog A (ras related) (RALA)                                 | 621  | 0.42 | 7  |
| 1 | ENST00000265744 | NM_001635 | amphiphysin (Stiff-Man syndrome with breast cancer 128kDa autoantigen) (AMPH), transcript variant 1 | 3171 | 0.48 | 7  |
| 1 | ENST00000242210 | NM_016489 | 5'-nucleotidase, cytosolic III (NT5C3)                                                              | 1458 | 0.34 | 7  |
| 1 | ENST00000258729 | NM_006547 | IGF-II mRNA-binding protein 3 (KOC1)                                                                | 1476 | 0.46 | 7  |
| 1 | ENST00000242150 | NM_019059 | homolog of Tom7 ( <i>S. cerevisiae</i> ) (TOM7)                                                     | 150  | 0.51 | 7  |
| 1 | ENST00000258735 | NM_012294 | guanine nucleotide exchange factor for Rap1; M-Ras-regulated GEF (GFR)                              | 1807 | 0.45 | 7  |
| 1 | ENST00000258737 | NM_018890 | ras-related C3 botulinum toxin substrate 1 (rho family,                                             | 597  | 0.48 | 7  |

|   |                 |           | small GTP binding protein Rac1 (RAC1), transcript<br>variant Rac1b                            |      |      |    |
|---|-----------------|-----------|-----------------------------------------------------------------------------------------------|------|------|----|
| 1 | ENST00000265847 | NM_015622 | CGI-43 protein (LOC51622)                                                                     | 2330 | 0.44 | 7  |
| 1 | ENST00000257343 | NM_024089 | KDEL (Lys-Asp-Glu-Leu) containing 1 (KDEL1)                                                   | 1509 | 0.44 | 13 |
| 1 | ENST00000245302 | NM_032813 | hypothetical protein FLJ14624 (FLJ14624)                                                      | 1437 | 0.5  | 13 |
| 1 | ENST00000261573 | NM_003576 | serine/threonine kinase 24 (STE20 homolog, yeast)<br>(STK24)                                  | 1442 | 0.5  | 13 |
| 1 | ENST00000258655 | NM_015842 | LIM domain only 7 (LMO7), transcript variant 2                                                | 3774 | 0.43 | 13 |
| 1 | ENST00000218971 | NM_012141 | DEAD/H (Asp-Glu-Ala-Asp/His) box polypeptide 26<br>(DDX26)                                    | 3134 | 0.46 | 13 |
| 1 | ENST00000258645 | NM_003850 | succinate-CoA ligase, ADP-forming, beta subunit<br>(SUCLA2)                                   | 2164 | 0.39 | 13 |
| 1 | ENST00000218567 | NM_012345 | nuclear fragile X mental retardation protein interacting<br>protein 1 (NUFIP1)                | 3445 | 0.38 | 13 |
| 1 | ENST00000255315 | NM_015932 | hypothetical protein HSPC014 (HSPC014)                                                        | 420  | 0.39 | 13 |
| 1 | ENST0000028585  | NM_005932 | mitochondrial intermediate peptidase (MIPEP), nuclear<br>gene encoding mitochondrial protein  | 2375 | 0.46 | 13 |
| 1 | ENST00000167218 | NM_002598 | programmed cell death 2 (PDCD2), transcript variant 1                                         | 1261 | 0.51 | 6  |
| 1 | ENST0000028008  | NM_003730 | ribonuclease 6 precursor (RNASE6PL)                                                           | 774  | 0.52 | 6  |
| 1 | ENST00000229760 | NM_019041 | similar to prokaryotic-type class I peptide chain release<br>factors (LOC54516)               | 1140 | 0.46 | 6  |
| 1 | ENST00000031135 | NM_014739 | KIAA0164 gene product (KIAA0164)                                                              | 2502 | 0.43 | 6  |
| 1 | ENST00000230093 | NM_006620 | HBS1-like ( <i>S. cerevisiae</i> ) (HBS1L)                                                    | 735  | 0.43 | 6  |
| 1 | ENST00000257984 | NM_021820 | MDS024 protein (MDS024)                                                                       | 507  | 0.41 | 6  |
| 1 | ENST00000229552 | NM_015952 | PTD013 protein (PTD013)                                                                       | 976  | 0.4  | 6  |
| 1 | ENST00000199712 | NM_016262 | epsilon-tubulin (TUBE)                                                                        | 1410 | 0.42 | 6  |
| 1 | ENST00000027474 | NM_007214 | SEC63, endoplasmic reticulum translocon component ( <i>S.</i><br><i>cerevisiae</i> ) (SEC63L) | 3160 | 0.4  | 6  |
| 1 | ENST00000252638 | NM_032730 | reticulon 4 interacting protein 1 (RTN4IP1)                                                   | 1062 | 0.44 | 6  |
| 1 | ENST00000243273 | NM_014165 | HSPC125 protein (HSPC125)                                                                     | 698  | 0.42 | 6  |
| 1 | ENST00000257787 | NM_018064 | hypothetical protein FLJ10342 (FLJ10342)                                                      | 600  | 0.52 | 6  |
| 1 | ENST00000257789 | NM_012381 | origin recognition complex, subunit 3-like (yeast)<br>(ORC3L)                                 | 2440 | 0.39 | 6  |
| 1 | ENST00000229452 | NM_006416 | solute carrier family 35 (CMP-sialic acid transporter),<br>member 1 (SLC35A1)                 | 582  | 0.43 | 6  |
| 1 | ENST00000257768 | NM_006372 | NS1-associated protein 1 (NSAP1)                                                              | 2013 | 0.41 | 6  |

|   |                 |           |                                                                                                                    |      |      |    |
|---|-----------------|-----------|--------------------------------------------------------------------------------------------------------------------|------|------|----|
| 1 | ENST00000230459 | NM_001865 | cytochrome c oxidase subunit VIIa polypeptide 2 (liver)<br>(COX7A2), nuclear gene encoding mitochondrial protein   | 231  | 0.47 | 6  |
| 1 | ENST00000229422 | NM_003214 | TEA domain family member 3 (TEAD3)                                                                                 | 1311 | 0.6  | 6  |
| 1 | ENST00000211960 | NM_006913 | ring finger protein 5 (RNF5)                                                                                       | 540  | 0.58 | 6  |
| 1 | ENST00000259915 | NM_002701 | POU domain, class 5, transcription factor 1 (POU5F1)                                                               | 1333 | 0.58 | 6  |
| 1 | ENST00000229922 | NM_006366 | adenylyl cyclase-associated protein 2 (CAP2)                                                                       | 1434 | 0.48 | 6  |
| 1 | ENST00000262078 | NM_004233 | CD83 antigen (activated B lymphocytes, immunoglobulin<br>superfamily) (CD83)                                       | 579  | 0.52 | 6  |
| 1 | ENST00000211979 | NM_004415 | desmoplakin (DPI, DPII) (DSP)                                                                                      | 9588 | 0.48 | 6  |
| 1 | ENST00000259818 | NM_001069 | tubulin, beta polypeptide (TUBB)                                                                                   | 1335 | 0.61 | 6  |
| 1 | ENST00000262225 | NM_006815 | coated vesicle membrane protein (RNP24)                                                                            | 779  | 0.46 | 18 |
| 1 | ENST00000261735 | NM_006817 | chromosome 12 open reading frame 8 (C12orf8)                                                                       | 885  | 0.56 | 12 |
| 1 | ENST00000240055 | NM_006166 | nuclear transcription factor Y, beta (NFYB)                                                                        | 588  | 0.38 | 12 |
| 1 | ENST00000240079 | NM_016053 | CGI-116 protein (CGI-116)                                                                                          | 683  | 0.47 | 12 |
| 1 | ENST00000261227 | NM_018838 | 13kDa differentiation-associated protein (DAP13)                                                                   | 435  | 0.45 | 12 |
| 1 | ENST00000261224 | NM_014050 | mitochondrial ribosomal protein L42 (MRPL42), transcript<br>variant 1, nuclear gene encoding mitochondrial protein | 384  | 0.4  | 12 |
| 1 | ENST00000256151 | NM_014167 | HSPC128 protein (HSPC128)                                                                                          | 1055 | 0.39 | 12 |
| 1 | ENST00000229214 | NM_007043 | HIV-1 rev binding protein 2 (HRB2)                                                                                 | 840  | 0.4  | 12 |
| 1 | ENST00000258146 | NM_001874 | carboxypeptidase M (CPM)                                                                                           | 1991 | 0.43 | 12 |
| 1 | ENST00000247818 | NM_015646 | RAP1B, member of RAS oncogene family (RAP1B)                                                                       | 1773 | 0.35 | 12 |
| 1 | ENST00000258145 | NM_002076 | glucosamine (N-acetyl)-6-sulfatase (Sanfilippo disease<br>IIID) (GNS)                                              | 2292 | 0.47 | 12 |
| 1 | ENST00000228682 | NM_005269 | glioma-associated oncogene homolog (zinc finger protein)<br>(GLI)                                                  | 3318 | 0.59 | 12 |
| 1 | ENST00000228312 | NM_032031 | FKSG17 (FKSG17)                                                                                                    | 1059 | 0.49 | 12 |
| 1 | ENST00000262031 | NM_002898 | RNA binding motif, single stranded interacting protein 2<br>(RBMS2)                                                | 1493 | 0.5  | 12 |
| 1 | ENST00000207437 | NM_002475 | myosin light chain 1 slow a (MLC1SA)                                                                               | 623  | 0.58 | 12 |
| 1 | ENST00000257905 | NM_006741 | protein phosphatase 1, regulatory (inhibitor) subunit 1A<br>(PPP1R1A)                                              | 513  | 0.57 | 12 |
| 1 | ENST00000257944 | NM_031157 | heterogeneous nuclear ribonucleoprotein A1 (HNRPA1),<br>transcript variant 2                                       | 1101 | 0.49 | 12 |
| 1 | ENST00000257945 | NM_031157 | heterogeneous nuclear ribonucleoprotein A1 (HNRPA1),<br>transcript variant 2                                       | 945  | 0.48 | 12 |
| 1 | ENST00000243040 | NM_002624 | prefoldin 5 (PFDN5), transcript variant 1                                                                          | 586  | 0.51 | 12 |



|   |                 |           |                                                                                                                                   |      |      |    |
|---|-----------------|-----------|-----------------------------------------------------------------------------------------------------------------------------------|------|------|----|
| 1 | ENST00000252252 | NM_005555 | keratin 6B (KRT6B)                                                                                                                | 1837 | 0.59 | 12 |
| 1 | ENST00000262053 | NM_005171 | activating transcription factor 1 (ATF1)                                                                                          | 959  | 0.42 | 12 |
| 1 | ENST00000070846 | NM_004572 | plakophilin 2 (PKP2)                                                                                                              | 2292 | 0.55 | 12 |
| 1 | ENST00000240651 | NM_024854 | hypothetical protein FLJ22028 (FLJ22028)                                                                                          | 2903 | 0.36 | 12 |
| 1 | ENST00000240636 | NM_006249 | proline-rich protein BstNI subfamily 3 (PRB3)                                                                                     | 633  | 0.62 | 12 |
| 1 | ENST00000228792 | NM_018048 | hypothetical protein FLJ10292 (FLJ10292)                                                                                          | 782  | 0.4  | 12 |
| 1 | ENST00000261336 | NM_002864 | pregnancy-zone protein (PZP)                                                                                                      | 4622 | 0.47 | 12 |
| 1 | ENST00000261348 | NM_000014 | alpha-2-macroglobulin (A2M)                                                                                                       | 4555 | 0.49 | 12 |
| 1 | ENST00000000412 | NM_002355 | mannose-6-phosphate receptor (cation dependent) (M6PR)                                                                            | 831  | 0.5  | 12 |
| 1 | ENST00000203772 | NM_015509 | DKFZP566B183 protein (DKFZP566B183)                                                                                               | 2332 | 0.43 | 12 |
| 1 | ENST00000075120 | NM_006931 | solute carrier family 2 (facilitated glucose transporter),<br>member 3 (SLC2A3)                                                   | 3661 | 0.46 | 12 |
| 1 | ENST00000203630 | NM_005439 | myeloid leukemia factor 2 (MLF2)                                                                                                  | 1517 | 0.57 | 12 |
| 1 | ENST00000228843 | NM_006479 | RAD51-interacting protein (PIR51)                                                                                                 | 1218 | 0.4  | 12 |
| 1 | ENST00000001008 | NM_002014 | FK506 binding protein 4, 59kDa (FKBP4)                                                                                            | 2156 | 0.54 | 12 |
| 1 | ENST00000251582 | NM_014244 | a disintegrin-like and metalloprotease (repolysin type)<br>with thrombospondin type 1 motif, 2 (ADAMTS2),<br>transcript variant 1 | 3169 | 0.64 | 5  |
| 1 | ENST00000230673 | NM_002082 | G protein-coupled receptor kinase 6 (GPRK6)                                                                                       | 1728 | 0.6  | 5  |
| 1 | ENST00000265093 | NM_003945 | ATPase, H <sup>+</sup> transporting, lysosomal 9kDa, V0 subunit e<br>(ATP6V0E)                                                    | 243  | 0.49 | 5  |
| 1 | ENST00000265094 | NM_033645 | F-box and WD-40 domain protein 1B (FBXW1B),<br>transcript variant 1                                                               | 4166 | 0.42 | 5  |
| 1 | ENST00000255262 | NM_020167 | neuromedin U receptor 2 (NMU2R)                                                                                                   | 579  | 0.45 | 5  |
| 1 | ENST00000231507 | NM_000800 | fibroblast growth factor 1 (acidic) (FGF1), transcript<br>variant 1                                                               | 2235 | 0.46 | 5  |
| 1 | ENST00000265196 | NM_001903 | catenin (cadherin-associated protein), alpha 1, 102kDa<br>(CTNNA1)                                                                | 3466 | 0.48 | 5  |
| 1 | ENST00000265190 | NM_004730 | eukaryotic translation termination factor 1 (ETF1)                                                                                | 3656 | 0.42 | 5  |
| 1 | ENST00000254900 | NM_006696 | skeletal muscle abundant protein (SMAP)                                                                                           | 3994 | 0.48 | 5  |
| 1 | ENST00000231487 | NM_006930 | S-phase kinase-associated protein 1A (p19A) (SKP1A),<br>transcript variant 1                                                      | 1347 | 0.37 | 5  |
| 1 | ENST00000231512 | NM_020199 | HTGN29 protein (HTGN29)                                                                                                           | 2296 | 0.39 | 6  |
| 1 | ENST00000200652 | NM_003059 | solute carrier family 22 (organic cation transporter),<br>member 4 (SLC22A4)                                                      | 2135 | 0.5  | 5  |
| 1 | ENST00000257435 | NM_004772 | P311 protein (P311)                                                                                                               | 201  | 0.49 | 5  |

|   |                 |           |                                                                                                                   |      |      |    |
|---|-----------------|-----------|-------------------------------------------------------------------------------------------------------------------|------|------|----|
| 1 | ENST00000237853 | NM_012081 | ELL-related RNA polymerase II, elongation factor (ELL2)                                                           | 1923 | 0.45 | 5  |
| 1 | ENST00000237858 | NM_002064 | glutaredoxin (thioltransferase) (GLRX)                                                                            | 1329 | 0.44 | 5  |
| 1 | ENST00000254147 | NM_022874 | survival of motor neuron 1, telomeric (SMN1), transcript variant b                                                | 1493 | 0.41 | 5  |
| 1 | ENST00000256443 | NM_001799 | cyclin-dependent kinase 7 (MO15 homolog, <i>Xenopus laevis</i> , cdk-activating kinase) (CDK7)                    | 718  | 0.42 | 5  |
| 1 | ENST00000199320 | NM_014473 | putative dimethyladenosine transferase (HSA9761)                                                                  | 1505 | 0.41 | 5  |
| 1 | ENST00000256748 | NM_002184 | interleukin 6 signal transducer (gp130, oncostatin M receptor) (IL6ST)                                            | 2827 | 0.4  | 5  |
| 1 | ENST00000230890 | NM_002130 | 3-hydroxy-3-methylglutaryl-Coenzyme A synthase 1 (soluble) (HMGCS1)                                               | 1108 | 0.43 | 5  |
| 1 | ENST00000252003 | NM_007118 | triple functional domain (PTPRF interacting) (TRIO)                                                               | 8900 | 0.54 | 5  |
| 1 | ENST00000264929 | NM_013232 | programmed cell death 6 (PDCD6)                                                                                   | 5603 | 0.58 | 5  |
| 1 | ENST00000227135 | NM_017425 | sperm autoantigenic protein 17 (SPA17)                                                                            | 453  | 0.44 | 11 |
| 1 | ENST00000264018 | NM_004397 | DEAD/H (Asp-Glu-Ala-Asp/His) box polypeptide 6 (RNA helicase, 54kDa) (DDX6)                                       | 3653 | 0.4  | 11 |
| 1 | ENST00000252108 | NM_004788 | ubiquitination factor E4A (UFD2 homolog, yeast) (UBE4A)                                                           | 2852 | 0.45 | 11 |
| 1 | ENST00000265882 | NM_016090 | RNA binding motif protein 7 (RBM7)                                                                                | 819  | 0.44 | 11 |
| 1 | ENST00000260262 | NM_017589 | B-cell translocation gene 4 (BTG4)                                                                                | 668  | 0.43 | 11 |
| 1 | ENST00000260270 | NM_004109 | ferredoxin 1 (FDX1), nuclear gene encoding mitochondrial protein                                                  | 1468 | 0.43 | 11 |
| 1 | ENST00000260318 | NM_138775 | hypothetical protein BC015183 (LOC91801)                                                                          | 1479 | 0.43 | 11 |
| 1 | ENST00000260309 | NM_001223 | caspase 1, apoptosis-related cysteine protease (interleukin 1, beta, convertase) (CASP1), transcript variant beta | 1334 | 0.43 | 11 |
| 1 | ENST00000263317 | NM_016931 | NADPH oxidase 4 (NOX4)                                                                                            | 1675 | 0.39 | 11 |
| 1 | ENST00000227618 | NM_014042 | DKFZP564M082 protein (DKFZP564M082)                                                                               | 884  | 0.55 | 11 |
| 1 | ENST00000007633 | NM_000694 | aldehyde dehydrogenase 3 family, member B1 (ALDH3B1)                                                              | 1399 | 0.64 | 11 |
| 1 | ENST00000255084 | NM_000695 | aldehyde dehydrogenase 3 family, member B2 (ALDH3B2)                                                              | 1152 | 0.62 | 11 |
| 1 | ENST00000246719 | NM_031904 | hypothetical protein FKSG44 (FKSG44)                                                                              | 1997 | 0.65 | 11 |
| 1 | ENST00000255685 | NM_006054 | reticulon 3 (RTN3)                                                                                                | 708  | 0.51 | 11 |
| 1 | ENST00000265471 | NM_012200 | NM_012200beta-1,3-glucuronyltransferase 3 (glucuronosyltransferase I) (B3GAT3)                                    | 1442 | 0.64 | 11 |
| 1 | ENST00000227520 | NM_024098 | hypothetical protein MGC2574 (MGC2574)                                                                            | 1893 | 0.6  | 11 |

|   |                 |           |                                                                                      |      |      |    |
|---|-----------------|-----------|--------------------------------------------------------------------------------------|------|------|----|
| 1 | ENST00000054950 | NM_002901 | reticulocalbin 1, EF-hand calcium binding domain (RCN1)                              | 2107 | 0.45 | 11 |
| 1 | ENST00000265963 | NM_005316 | general transcription factor IIIH, polypeptide 1 (62kD subunit) (GTF2H1)             | 1660 | 0.41 | 11 |
| 1 | ENST00000249924 | NM_002786 | proteasome (prosome, macropain) subunit, alpha type, 1 (PSMA1), transcript variant 2 | 1211 | 0.42 | 11 |
| 1 | ENST00000250674 | NM_005969 | nucleosome assembly protein 1-like 4 (NAP1L4)                                        | 1113 | 0.43 | 11 |
| 1 | ENST00000225000 | NM_006541 | thioredoxin-like 2 (TXNL2)                                                           | 1005 | 0.44 | 10 |
| 1 | ENST00000263140 | NM_018472 | uncharacterized hypothalamus protein HT011 (HT011)                                   | 694  | 0.47 | 10 |
| 1 | ENST00000224950 | NM_024928 | hypothetical protein FLJ22559 (FLJ22559)                                             | 1104 | 0.48 | 10 |
| 1 | ENST00000260680 | NM_005736 | ARP1 actin-related protein 1 homolog A, contractin alpha (yeast) (ACTR1A)            | 2725 | 0.55 | 10 |
| 1 | ENST00000252129 | NM_022039 | split hand/foot malformation (ectrodactyly) type 3 (SHFM3)                           | 681  | 0.62 | 10 |
| 1 | ENST00000266053 | NM_005063 | stearoyl-CoA desaturase (delta-9-desaturase) (SCD)                                   | 5362 | 0.47 | 10 |
| 1 | ENST00000266061 | NM_018425 | phosphatidylinositol 4-kinase type II (PI4KII)                                       | 801  | 0.51 | 10 |
| 1 | ENST00000265992 | NM_019084 | hypothetical protein FLJ10895 (FLJ10895)                                             | 726  | 0.45 | 10 |
| 1 | ENST00000265995 | NM_020992 | PDZ and LIM domain 1 (elfin) (PDLIM1)                                                | 1109 | 0.49 | 10 |
| 1 | ENST00000260709 | NM_032810 | hypothetical protein FLJ14600 (FLJ14600)                                             | 453  | 0.42 | 10 |
| 1 | ENST00000263101 | NM_003201 | transcription factor 6-like 1 (mitochondrial transcription factor 1-like) (TCF6L1)   | 1586 | 0.32 | 10 |
| 1 | ENST00000242476 | NM_018464 | uncharacterized hematopoietic stem/progenitor cells protein MDS029 (MDS029)          | 495  | 0.39 | 10 |
| 1 | ENST00000259276 | NM_005470 | spectrin SH3 domain binding protein 1 (SSH3BP1)                                      | 2343 | 0.42 | 10 |
| 1 | ENST00000224853 | NM_020824 | Rho-GTPase activating protein 10 (ARHGAP10)                                          | 4651 | 0.44 | 10 |
| 1 | ENST00000189637 | NM_006393 | nebulette (NEBL)                                                                     | 8037 | 0.38 | 10 |
| 1 | ENST00000263124 | NM_001494 | GDP dissociation inhibitor 2 (GDI2)                                                  | 2077 | 0.4  | 10 |
| 1 | ENST00000264690 | NM_000892 | kallikrein B, plasma (Fletcher factor) 1 (KLKB1)                                     | 1683 | 0.45 | 4  |
| 1 | ENST00000261511 | NM_017867 | hypothetical protein FLJ20534 (FLJ20534)                                             | 1154 | 0.38 | 4  |
| 1 | ENST00000240488 | NM_032117 | GAJ protein (GAJ)                                                                    | 567  | 0.38 | 4  |
| 1 | ENST00000226587 | NM_003340 | ubiquitin-conjugating enzyme E2D 3 (UBC4/5 homolog, yeast) (UBE2D3)                  | 657  | 0.39 | 4  |
| 1 | ENST00000226522 | NM_021970 | mitogen-activated protein kinase kinase 1 interacting protein 1 (MAP2K1IP1)          | 1120 | 0.35 | 4  |
| 1 | ENST00000237612 | NM_004827 | ATP-binding cassette, sub-family G (WHITE), member 2 (ABCG2)                         | 1965 | 0.43 | 4  |
| 1 | ENST00000226355 | NM_001133 | afamin (AFM)                                                                         | 1999 | 0.39 | 4  |

|   |                 |           |                                                                                            |      |      |   |
|---|-----------------|-----------|--------------------------------------------------------------------------------------------|------|------|---|
| 1 | ENST00000264220 | NM_002703 | phosphoribosyl pyrophosphate amidotransferase (PPAT)                                       | 1657 | 0.43 | 4 |
| 1 | ENST00000263925 | NM_032622 | ligand of numb-protein X (LNX)                                                             | 1071 | 0.53 | 4 |
| 1 | ENST00000261425 | NM_015990 | kelch-like 5 (Drosophila) (KLHL5)                                                          | 2678 | 0.38 | 4 |
| 1 | ENST00000237380 | NM_025205 | endothelial-derived gene 1 (EG1)                                                           | 1281 | 0.43 | 4 |
| 1 | ENST00000226299 | NM_015907 | leucine aminopeptidase 3 (LAP3)                                                            | 2081 | 0.48 | 4 |
| 1 | ENST00000245462 | NM_003704 | gene with multiple splice variants near HD locus on<br>4p16.3 (RES4-22)                    | 4029 | 0.53 | 4 |
| 1 | ENST00000232003 | NM_000412 | histidine-rich glycoprotein (HRG)                                                          | 1275 | 0.5  | 3 |
| 1 | ENST00000265025 | NM_018138 | hypothetical protein FLJ10560 (FLJ10560)                                                   | 2407 | 0.47 | 3 |
| 1 | ENST00000259037 | NM_002492 | NADH dehydrogenase (ubiquinone) 1 beta subcomplex, 5,<br>16kDa (NDUFB5)                    | 1033 | 0.39 | 3 |
| 1 | ENST00000264678 | NM_007217 | programmed cell death 10 (PDCD10), transcript variant 1                                    | 1041 | 0.36 | 3 |
| 1 | ENST00000264266 | NM_022736 | hypothetical protein FLJ14153 (FLJ14153)                                                   | 1451 | 0.46 | 3 |
| 1 | ENST00000264265 | NM_020169 | latexin protein (LXN)                                                                      | 1045 | 0.42 | 3 |
| 1 | ENST00000264942 | NM_014245 | ring finger protein 7 (RNF7)                                                               | 369  | 0.59 | 3 |
| 1 | ENST00000264995 | NM_007208 | mitochondrial ribosomal protein L3 (MRPL3), nuclear<br>gene encoding mitochondrial protein | 1120 | 0.46 | 3 |
| 1 | ENST00000251776 | NM_017578 | ropporin, rophilin associated protein (ROPN1)                                              | 1001 | 0.52 | 3 |
| 1 | ENST00000264231 | NM_022135 | popeye protein 2 (POP2)                                                                    | 1643 | 0.54 | 3 |
| 1 | ENST00000240922 | NM_025146 | likely ortholog of mouse Mak3p homolog ( <i>S. cerevisiae</i> )<br>(MAK3P)                 | 498  | 0.42 | 3 |
| 1 | ENST00000240851 | NM_006070 | TRK-fused gene (TFG)                                                                       | 1636 | 0.43 | 3 |
| 1 | ENST00000265259 | NM_020202 | Nit protein 2 (NIT2)                                                                       | 914  | 0.45 | 3 |
| 1 | ENST00000265538 | NM_001664 | ras homolog gene family, member A (ARHA)                                                   | 583  | 0.49 | 3 |
| 1 | ENST00000265539 | NM_016291 | mammalian inositol hexakisphosphate kinase 2 (IP6K2)                                       | 1677 | 0.52 | 3 |
| 1 | ENST00000232766 | NM_025010 | KIAA0795 protein (KIAA0795)                                                                | 4272 | 0.52 | 3 |
| 1 | ENST00000011691 | NM_016305 | synovial sarcoma translocation gene on chromosome<br>18-like 2 (SS18L2)                    | 808  | 0.44 | 3 |
| 1 | ENST00000253688 | NM_004844 | SH3-domain binding protein 5 (BTK-associated)<br>(SH3BP5)                                  | 1275 | 0.56 | 3 |
| 1 | ENST00000256460 | NM_003656 | calcium/calmodulin-dependent protein kinase I (CAMK1)                                      | 1340 | 0.56 | 3 |
| 1 | ENST00000256496 | NM_018184 | hypothetical protein FLJ10702 (FLJ10702)                                                   | 732  | 0.51 | 3 |
| 1 | ENST00000244815 | NM_004735 | leucine rich repeat (in FLII) interacting protein 1<br>(LRRFIP1)                           | 3478 | 0.45 | 2 |
| 1 | ENST00000264603 | NM_006710 | COP9 homolog (COP9)                                                                        | 886  | 0.42 | 2 |
| 1 | ENST00000258416 | NM_004846 | eukaryotic translation initiation factor 4E-like 3 (EIF4EL3)                               | 913  | 0.5  | 2 |

|   |                 |           |                                                                                     |      |      |   |
|---|-----------------|-----------|-------------------------------------------------------------------------------------|------|------|---|
| 1 | ENST00000243759 | NM_005381 | nucleolin (NCL)                                                                     | 2112 | 0.47 | 2 |
| 1 | ENST00000264052 | NM_003113 | nuclear antigen Sp100 (SP100)                                                       | 2067 | 0.43 | 2 |
| 1 | ENST00000194530 | NM_018571 | amyotrophic lateral sclerosis 2 (juvenile) chromosome region, candidate 2 (ALS2CR2) | 1916 | 0.41 | 2 |
| 1 | ENST00000233071 | NM_014670 | basic leucine zipper and W2 domains 1 (BZW1)                                        | 1227 | 0.41 | 2 |
| 1 | ENST00000233892 | NM_015387 | preimplantation protein 3 (PREI3)                                                   | 2652 | 0.34 | 2 |
| 1 | ENST00000260957 | NM_005966 | NGFI-A binding protein 1 (EGR1 binding protein 1) (NAB1)                            | 2373 | 0.42 | 2 |
| 1 | ENST00000264146 | NM_014362 | 3-hydroxyisobutyryl-Coenzyme A hydrolase (HIBCH)                                    | 855  | 0.38 | 2 |
| 1 | ENST00000260970 | NM_004792 | peptidyl-prolyl isomerase G (cyclophilin G) (PPIG)                                  | 2132 | 0.38 | 2 |
| 1 | ENST00000260971 | NM_024622 | hypothetical protein FLJ21901 (FLJ21901)                                            | 2104 | 0.37 | 2 |
| 1 | ENST00000259241 | NM_004807 | heparan sulfate 6-O-sulfotransferase 1 (HS6ST1)                                     | 2055 | 0.66 | 2 |
| 1 | ENST00000263708 | NM_002830 | protein tyrosine phosphatase, non-receptor type 4 (megakaryocyte) (PTPN4)           | 2891 | 0.4  | 2 |
| 1 | ENST00000263330 | NM_019014 | similar to DNA-directed RNA polymerase I (135 kDa) (Rpo1-2)                         | 3836 | 0.45 | 2 |
| 1 | ENST00000233379 | NM_016044 | CGI-105 protein (CGI-105)                                                           | 1298 | 0.58 | 2 |
| 1 | ENST00000254636 | NM_006839 | inner membrane protein, mitochondrial (mitofilin) (IMMT)                            | 2545 | 0.46 | 2 |
| 1 | ENST00000254630 | NM_017952 | hypothetical protein FLJ20758 (FLJ20758)                                            | 1781 | 0.42 | 2 |
| 1 | ENST00000258091 | NM_006429 | chaperonin containing TCP1, subunit 7 (eta) (CCT7)                                  | 1776 | 0.51 | 2 |
| 1 | ENST00000258083 | NM_032319 | chromosome 2 open reading frame 7 (C2orf7)                                          | 564  | 0.59 | 2 |
| 1 | ENST00000234454 | NM_003124 | sepiapterin reductase (7,8-dihydrobiopterin:NADP+ oxidoreductase) (SPR)             | 833  | 0.63 | 2 |
| 1 | ENST00000260641 | NM_005722 | ARP2 actin-related protein 2 homolog (yeast) (ACTR2)                                | 2569 | 0.38 | 2 |
| 1 | ENST00000261353 | NM_016061 | yippee protein (CGI-127)                                                            | 363  | 0.48 | 2 |
| 1 | ENST00000260670 | NM_032546 | ring finger protein 30 (RNF30)                                                      | 591  | 0.55 | 2 |
| 1 | ENST00000238091 | NM_004763 | integrin cytoplasmic domain-associated protein 1 (ICAP-1A), transcript variant 1    | 447  | 0.42 | 2 |
| 1 | ENST00000234091 | NM_002166 | inhibitor of DNA binding 2, dominant negative helix-loop-helix protein (ID2)        | 960  | 0.43 | 2 |
| 1 | ENST00000263828 | NM_001126 | adenylosuccinate synthase (ADSS)                                                    | 927  | 0.35 | 1 |
| 1 | ENST00000251423 | NM_021023 | complement factor H related 3 (FHR-3)                                               | 1223 | 0.35 | 1 |
| 1 | ENST00000240802 | NM_007212 | ring finger protein 2 (RNF2)                                                        | 1008 | 0.42 | 1 |
| 1 | ENST00000237041 | NM_012113 | carbonic anhydrase XIV (CA14)                                                       | 1412 | 0.5  | 1 |
| 1 | ENST00000235397 | NM_005872 | breast carcinoma amplified sequence 2 (BCAS2)                                       | 1292 | 0.39 | 1 |

|   |                 |           |                                                                                                                             |      |      |   |
|---|-----------------|-----------|-----------------------------------------------------------------------------------------------------------------------------|------|------|---|
| 1 | ENST00000256637 | NM_002959 | sortilin 1 (SORT1)                                                                                                          | 2754 | 0.47 | 1 |
| 1 | ENST00000260519 | NM_004582 | Rab geranylgeranyltransferase, beta subunit (RABGGTB)                                                                       | 1158 | 0.38 | 1 |
| 1 | ENST00000235399 | NM_004768 | splicing factor, arginine/serine-rich 11 (SFRS11)                                                                           | 1107 | 0.48 | 1 |
| 1 | ENST00000262746 | NM_002574 | peroxiredoxin 1 (PRDX1)                                                                                                     | 903  | 0.46 | 1 |
| 1 | ENST00000253544 | NM_006367 | adenylyl cyclase-associated protein (CAP)                                                                                   | 1425 | 0.49 | 1 |
| 1 | ENST00000253548 | NM_012333 | c-myc binding protein (MYCBP)                                                                                               | 2003 | 0.4  | 1 |
| 1 | ENST00000257133 | NM_012392 | PEF protein with a long N-terminal hydrophobic domain<br>(peflin) (PEF)                                                     | 1584 | 0.55 | 1 |
| 1 | ENST00000247950 | NM_006600 | nuclear distribution gene C homolog ( <i>A. nidulans</i> )<br>(NUDC)                                                        | 1311 | 0.57 | 1 |
| 1 | ENST00000236412 | NM_002713 | protein phosphatase 1, regulatory (inhibitor) subunit 8<br>(PPP1R8), transcript variant 3                                   | 1053 | 0.52 | 1 |
| 1 | ENST00000263698 | NM_002946 | replication protein A2, 32kDa (RPA2)                                                                                        | 1320 | 0.45 | 1 |
| 1 | ENST00000236291 | NM_005563 | stathmin 1/oncoprotein 18 (STMN1)                                                                                           | 435  | 0.47 | 1 |
| 1 | ENST00000236261 | NM_013441 | Down syndrome critical region gene 1-like 2 (DSCR1L2)                                                                       | 828  | 0.5  | 1 |
| 1 | ENST00000234697 | NM_003198 | transcription elongation factor B (SIII), polypeptide 3<br>(110kDa, elongin A) (TCEB3)                                      | 2316 | 0.51 | 1 |
| 1 | ENST00000235287 | NM_003132 | spermidine synthase (SRM)                                                                                                   | 1235 | 0.64 | 1 |
| 1 | ENST00000263746 | NM_031921 | AAA-ATPase TOB3 (TOB3)                                                                                                      | 2470 | 0.65 | 1 |
| 1 | ENST00000251980 | NM_005058 | RNA binding motif protein, Y chromosome, family 1,<br>member A1 (RBMY1A1)                                                   | 1879 | 0.44 | Y |
| 1 | ENST00000173745 | NM_004660 | DEAD/H (Asp-Glu-Ala-Asp/His) box polypeptide, Y<br>chromosome (DBY)                                                         | 4339 | 0.39 | 3 |
| 1 | ENST00000262848 | NM_002760 | protein kinase, Y-linked (PRKY)                                                                                             | 1157 | 0.64 | Y |
| 1 | ENST00000247314 | NM_006014 | DNA segment on chromosome X (unique) 9879 expressed<br>sequence (DXS9879E)                                                  | 599  | 0.62 | X |
| 1 | ENST00000031803 | NM_005342 | high-mobility group box 3 (HMGB3)                                                                                           | 1558 | 0.42 | X |
| 1 | ENST00000257020 | NM_016024 | CGI-79 protein (CGI-79)                                                                                                     | 1768 | 0.44 | X |
| 1 | ENST00000218014 | NM_014060 | MCT-1 protein (MCT-1)                                                                                                       | 660  | 0.38 | X |
| 1 | ENST00000264355 | NM_022101 | hypothetical protein FLJ22965 (FLJ22965)                                                                                    | 1550 | 0.46 | X |
| 1 | ENST00000217959 | NM_052936 | AUT-like 2, cysteine endopeptidase ( <i>S. cerevisiae</i> )<br>(AUTL2)                                                      | 1182 | 0.43 | X |
| 1 | ENST00000263032 | NM_033152 | nuclear RNA export factor 5 (NXF5), transcript variant 2                                                                    | 1989 | 0.47 | X |
| 1 | ENST00000247385 | NM_004085 | translocase of inner mitochondrial membrane 8 homolog A<br>(yeast) (TIMM8A), nuclear gene encoding mitochondrial<br>protein | 1166 | 0.41 | X |

|   |                 |           |                                                                                                                                  |      |      |    |
|---|-----------------|-----------|----------------------------------------------------------------------------------------------------------------------------------|------|------|----|
| 1 | ENST00000263030 | NM_024917 | hypothetical protein FLJ12687 (FLJ12687)                                                                                         | 171  | 0.49 | X  |
| 1 | ENST00000218265 | NM_000291 | phosphoglycerate kinase 1 (PGK1)                                                                                                 | 1767 | 0.48 | X  |
| 1 | ENST00000253571 | NM_016120 | ring finger protein 12 (RNF12)                                                                                                   | 2088 | 0.43 | X  |
| 1 | ENST00000262784 | NM_012310 | kinesin family member 4A (KIF4A)                                                                                                 | 4326 | 0.46 | X  |
| 1 | ENST00000239666 | NM_016484 | hypothetical protein LOC51248 (LOC51248)                                                                                         | 981  | 0.48 | X  |
| 1 | ENST00000218472 | NM_007250 | Kruppel-like factor 8 (KLF8)                                                                                                     | 894  | 0.5  | X  |
| 1 | ENST00000218165 | NM_007075 | JM5 protein (JM5)                                                                                                                | 1571 | 0.57 | X  |
| 1 | ENST00000263235 | NM_005834 | translocase of inner mitochondrial membrane 17 homolog<br>B (yeast) (TIMM17B)                                                    | 873  | 0.62 | X  |
| 1 | ENST00000218440 | NM_006743 | RNA binding motif protein 3 (RBM3)                                                                                               | 1296 | 0.45 | X  |
| 1 | ENST00000163256 | NM_032591 | solute carrier family 9 (sodium/hydrogen exchanger),<br>isoform 7 (SLC9A7)                                                       | 2175 | 0.53 | X  |
| 1 | ENST00000244357 | NM_001356 | DEAD/H (Asp-Glu-Ala-Asp/His) box polypeptide 3<br>(DDX3), transcript variant 2                                                   | 4418 | 0.4  | X  |
| 1 | ENST00000265816 | NM_005765 | ATPase, H <sup>+</sup> transporting, lysosomal (vacuolar proton<br>pump) membrane sector associated protein M8-9<br>(ATP6M8-9)   | 622  | 0.38 | X  |
| 1 | ENST00000253039 | NM_001415 | eukaryotic translation initiation factor 2, subunit 3 gamma,<br>52kDa (EIF2S3)                                                   | 1416 | 0.43 | X  |
| 1 | ENST00000217897 | NM_003916 | adaptor-related protein complex 1, sigma 2 subunit<br>(AP1S2)                                                                    | 433  | 0.38 | X  |
| 1 | ENST00000218027 | NM_002765 | phosphoribosyl pyrophosphate synthetase 2 (PRPS2)                                                                                | 954  | 0.52 | X  |
| 1 | ENST00000262648 | NM_000216 | Kallmann syndrome 1 sequence (KAL1)                                                                                              | 6047 | 0.39 | X  |
| 1 | ENST00000004999 | NM_009589 | arylsulfatase D (ARSD), transcript variant 2                                                                                     | 1823 | 0.57 | X  |
| 1 | ENST00000216075 | NM_017584 | aldehyde reductase (aldose reductase) like 6 (ALDRL6)                                                                            | 844  | 0.61 | 22 |
| 1 | ENST00000216184 | NM_015380 | CGI-51 protein (CGI-51)                                                                                                          | 1538 | 0.48 | 22 |
| 1 | ENST00000216225 | NM_014248 | ring-box 1 (RBX1)                                                                                                                | 315  | 0.52 | 22 |
| 1 | ENST00000263247 | NM_021822 | apolipoprotein B mRNA editing enzyme, catalytic<br>polypeptide-like 3G (APOBEC3G)                                                | 1465 | 0.48 | 22 |
| 1 | ENST00000262832 | NM_016091 | eukaryotic translation initiation factor 3, subunit 6<br>interacting protein (EIF3S6IP)                                          | 1680 | 0.49 | 22 |
| 1 | ENST00000248924 | NM_014291 | glycine C-acetyltransferase (2-amino-3-ketobutyrate<br>coenzyme A ligase) (GCAT), nuclear gene encoding<br>mitochondrial protein | 1442 | 0.62 | 22 |
| 1 | ENST00000216185 | NM_012473 | thioredoxin 2 (TXN2)                                                                                                             | 756  | 0.58 | 22 |
| 1 | ENST00000216110 | NM_021076 | neurofilament, heavy polypeptide (200kD) (NEFH)                                                                                  | 1209 | 0.69 | 22 |

|   |                 |           |                                                                                                                        |      |      |    |
|---|-----------------|-----------|------------------------------------------------------------------------------------------------------------------------|------|------|----|
| 1 | ENST00000255882 | NM_058004 | phosphatidylinositol 4-kinase, catalytic, alpha polypeptide (PIK4CA), transcript variant 2                             | 3026 | 0.56 | 22 |
| 1 | ENST00000215924 | NM_002688 | peanut-like 1 (Drosophila) (PNUTL1)                                                                                    | 1017 | 0.58 | 22 |
| 1 | ENST00000263202 | NM_005659 | ubiquitin fusion degradation 1-like (UFD1L)                                                                            | 1041 | 0.51 | 22 |
| 1 | ENST00000215835 | NM_016335 | proline dehydrogenase (oxidase) 1 (PRODH), nuclear gene encoding mitochondrial protein                                 | 2385 | 0.63 | 22 |
| 1 | ENST00000243920 | NM_080821 | chromosome 20 open reading frame 108 (C20orf108)                                                                       | 576  | 0.58 | 20 |
| 1 | ENST00000217069 | NM_003404 | tyrosine 3-monooxygenase/tryptophan 5-monooxygenase activation protein, beta polypeptide (YWHAB), transcript variant 1 | 840  | 0.44 | 20 |
| 1 | ENST00000244020 | NM_006275 | NM_006275splicing factor, arginine/serine-rich 6 (SFRS6)                                                               | 697  | 0.56 | 20 |
| 1 | ENST00000246195 | NM_014183 | dynein, cytoplasmic, light polypeptide 2A (DNCL2A)                                                                     | 252  | 0.54 | 20 |
| 1 | ENST00000217347 | NM_012325 | microtubule-associated protein, RP/EB family, member 1 (MAPRE1)                                                        | 2483 | 0.42 | 20 |
| 1 | ENST00000240499 | NM_003441 | zinc finger protein 141 (clone pHZ-44) (ZNF141)                                                                        | 223  | 0.48 | 4  |
| 1 | ENST00000262549 | NM_014426 | sorting nexin 5 (SNX5), transcript variant 2                                                                           | 1922 | 0.41 | 20 |
| 1 | ENST00000246069 | NM_006870 | destrin (actin depolymerizing factor) (DSTN)                                                                           | 492  | 0.39 | 20 |
| 1 | ENST00000254983 | NM_002592 | proliferating cell nuclear antigen (PCNA)                                                                              | 1230 | 0.43 | 20 |
| 1 | ENST00000262927 | NM_004648 | NM_080792protein tyrosine phosphatase, non-receptor type substrate 1 (PTPNS1)                                          | 1521 | 0.58 | 20 |
| 1 | ENST00000216879 | NM_018839 | p47 protein (LOC55968)                                                                                                 | 1368 | 0.54 | 20 |
| 1 | ENST00000217244 | NM_001895 | casein kinase 2, alpha 1 polypeptide (CSNK2A1)                                                                         | 1285 | 0.46 | 20 |
